# Supplementary material for: A series of energetic cyclo-pentazolate salts: rapid synthesis, characterization, and promising performance
Source: Royal Society of Chemistry journal article supplement (doi:10.1039/c9ta01077g), 2019-01-01
Supplement: c9ta01077g1.pdf [file c9ta01077g1.pdf]

## **Electronic Supplementary Information**

### **A series of energetic *cyclo*-pentazolate salts: rapid synthesis, characterization, and promising performance**

Yuangang Xu,<sup>a</sup> Lili Tian,<sup>a</sup> Dongxue Li,<sup>b</sup> Pengcheng Wang\*<sup>a</sup> and Ming Lu\*<sup>a</sup>

<sup>a</sup> School of Chemical Engineering, Nanjing University of Science and Technology,  
Nanjing 210094, Jiangsu, China.

<sup>b</sup> China National Quality Supervision Testing Center for Industrial Explosive Materials,  
Xiaolingwei 200, Nanjing 210094, Jiangsu, China.

E-mail: *alexwpch@njust.edu.cn*; *luming@njust.edu.cn*

## Table of Contents

|                                                                              |     |
|------------------------------------------------------------------------------|-----|
| 1. Single-crystal X-ray diffraction analysis of <b>2</b>                     | S3  |
| 2. Single-crystal X-ray diffraction analysis of <b>3</b>                     | S5  |
| 3. Single-crystal X-ray diffraction analysis of <b>4·2H<sub>2</sub>O</b>     | S7  |
| 4. Single-crystal X-ray diffraction analysis of <b>5</b>                     | S9  |
| 5. Single-crystal X-ray diffraction analysis of <b>6</b>                     | S11 |
| 6. Single-crystal X-ray diffraction analysis of <b>7</b>                     | S14 |
| 7. Single-crystal X-ray diffraction analysis of <b>8</b>                     | S17 |
| 8. Single-crystal X-ray diffraction analysis of <b>9</b>                     | S19 |
| 9. Single-crystal X-ray diffraction analysis of <b>10</b>                    | S21 |
| 10. The noncovalent interactions study                                       | S24 |
| 11. <sup>1</sup> H and <sup>13</sup> C NMR spectra                           | S25 |
| 12. Powder X-ray diffraction (PXRD) pattern of AgN <sub>5</sub> ( <b>1</b> ) | S31 |
| 13. Topology for <b>2</b>                                                    | S32 |
| 14. TG and DSC curves of <b>4·2H<sub>2</sub>O</b>                            | S32 |
| 15. Calculation of heats of formation                                        | S33 |
| References                                                                   | S33 |

## 1. Single-crystal X-ray diffraction analysis of **2**

Table S1. Crystal data and structure refinement for **2**

| <b>2</b>                                                     |                                                                             |
|--------------------------------------------------------------|-----------------------------------------------------------------------------|
| CCDC                                                         | 1885286                                                                     |
| Empirical formula                                            | KN <sub>5</sub>                                                             |
| Formula weight                                               | 109.15                                                                      |
| Temperature / K                                              | 150                                                                         |
| Crystal system                                               | Orthorhombic                                                                |
| Space group                                                  | <i>Pnma</i>                                                                 |
| <i>a</i> / Å                                                 | 7.835(3)                                                                    |
| <i>b</i> / Å                                                 | 6.304(2)                                                                    |
| <i>c</i> / Å                                                 | 7.332(3)                                                                    |
| $\alpha$ / °                                                 | 90.00                                                                       |
| $\beta$ / °                                                  | 90.00                                                                       |
| $\gamma$ / °                                                 | 90.00                                                                       |
| Volume / Å <sup>3</sup>                                      | 362.1(2)                                                                    |
| <i>Z</i>                                                     | 4                                                                           |
| $\rho_{\text{calc}}$ / g cm <sup>-3</sup>                    | 2.002                                                                       |
| $\mu$ / mm <sup>-1</sup>                                     | 1.268                                                                       |
| <i>F</i> (000)                                               | 216.0                                                                       |
| Crystal size / mm <sup>3</sup>                               | 0.19×0.12×0.08                                                              |
| Radiation                                                    | MoK $\alpha$ ( $\lambda$ = 0.71073)                                         |
| 2 $\theta$ range for data collection/°                       | 7.612 to 52.55                                                              |
| Index ranges                                                 | -9 ≤ <i>h</i> ≤ 9, -7 ≤ <i>k</i> ≤ 7, -8 ≤ <i>l</i> ≤ 9                     |
| Reflections collected                                        | 2236                                                                        |
| Independent reflections                                      | 397 [ <i>R</i> <sub>int</sub> = 0.0341, <i>R</i> <sub>sigma</sub> = 0.0258] |
| Data / restraints / parameters                               | 397 / 0 / 31                                                                |
| Goodness-of-fit on <i>F</i> <sup>2</sup>                     | 1.089                                                                       |
| Final <i>R</i> indexes [ <i>I</i> ≥ 2 $\sigma$ ( <i>I</i> )] | <i>R</i> <sub>1</sub> = 0.0246, w <i>R</i> <sub>2</sub> = 0.0668            |
| Final <i>R</i> indexes [all data]                            | <i>R</i> <sub>1</sub> = 0.0260, w <i>R</i> <sub>2</sub> = 0.0676            |
| Largest diff. peak / hole / e Å <sup>-3</sup>                | 0.31 / -0.43                                                                |

Table S2. Selected bond lengths for **2**

| parameter          | bond length (Å) | parameter          | bond length (Å) |
|--------------------|-----------------|--------------------|-----------------|
| K1-K1 <sup>1</sup> | 4.0310(12)      | K1-N1              | 2.8763(14)      |
| K1-K1 <sup>2</sup> | 4.0310(12)      | K1-N1 <sup>7</sup> | 2.8763(14)      |
| K1-N3 <sup>3</sup> | 2.9597(19)      | K1-N1 <sup>8</sup> | 2.9735(19)      |
| K1-N3 <sup>4</sup> | 3.0002(19)      | K1-N1 <sup>1</sup> | 2.9735(19)      |
| K1-N2              | 3.3106(14)      | N3-N2 <sup>9</sup> | 1.3203(15)      |
| K1-N2 <sup>5</sup> | 2.9028(14)      | N3-N2              | 1.3203(15)      |
| K1-N2 <sup>6</sup> | 2.9028(14)      | N2-N1              | 1.3097(19)      |
| K1-N2 <sup>7</sup> | 3.3106(14)      | N1-N1 <sup>9</sup> | 1.315(2)        |

<sup>1</sup>1-X,1-Y,2-Z; <sup>2</sup>1-X,2-Y,2-Z; <sup>3</sup>1-X,1-Y,1-Z; <sup>4</sup>1/2-X,1-Y,1/2+Z; <sup>5</sup>1/2+X,3/2-Y,3/2-Z; <sup>6</sup>1/2+X,+Y,3/2-Z; <sup>7</sup>+X,3/2-Y,+Z; <sup>8</sup>1-X,1/2+Y,2-Z; <sup>9</sup>+X,1/2-Y,+Z

Table S3. Selected bond angles for **2**

| parameter                           | bond angle (°) | parameter                            | bond angle (°) |
|-------------------------------------|----------------|--------------------------------------|----------------|
| K1 <sup>1</sup> -K1-K1 <sup>2</sup> | 102.87(3)      | N1-K1-N3 <sup>4</sup>                | 72.17(3)       |
| N3 <sup>3</sup> -K1-K1 <sup>2</sup> | 128.531(17)    | N1-K1-N3 <sup>3</sup>                | 88.74(4)       |
| N3 <sup>3</sup> -K1-K1 <sup>1</sup> | 128.531(17)    | N1 <sup>5</sup> -K1-N3 <sup>3</sup>  | 88.74(4)       |
| N3 <sup>4</sup> -K1-K1 <sup>2</sup> | 60.70(2)       | N1 <sup>6</sup> -K1-N3 <sup>4</sup>  | 68.45(4)       |
| N3 <sup>4</sup> -K1-K1 <sup>1</sup> | 60.70(2)       | N1 <sup>5</sup> -K1-N3 <sup>4</sup>  | 72.17(3)       |
| N3 <sup>3</sup> -K1-N3 <sup>4</sup> | 139.54(5)      | N1 <sup>2</sup> -K1-N3 <sup>4</sup>  | 68.45(4)       |
| N3 <sup>4</sup> -K1-N2 <sup>5</sup> | 72.42(4)       | N1-K1-N2 <sup>5</sup>                | 99.96(4)       |
| N3 <sup>4</sup> -K1-N2              | 72.41(4)       | N1 <sup>2</sup> -K1-N2 <sup>5</sup>  | 132.43(3)      |
| N3 <sup>3</sup> -K1-N2 <sup>5</sup> | 76.44(4)       | N1-K1-N2                             | 23.10(3)       |
| N3 <sup>3</sup> -K1-N2              | 76.44(4)       | N1 <sup>5</sup> -K1-N2 <sup>8</sup>  | 162.20(4)      |
| N3 <sup>3</sup> -K1-N1 <sup>6</sup> | 149.97(4)      | N1 <sup>5</sup> -K1-N2 <sup>7</sup>  | 72.89(4)       |
| N3 <sup>3</sup> -K1-N1 <sup>2</sup> | 149.97(4)      | N1 <sup>6</sup> -K1-N2 <sup>5</sup>  | 113.33(3)      |
| N2-K1-K1 <sup>1</sup>               | 128.39(3)      | N1 <sup>5</sup> -K1-N2               | 99.96(4)       |
| N2-K1-K1 <sup>2</sup>               | 68.64(3)       | N1-K1-N2 <sup>8</sup>                | 72.89(4)       |
| N2 <sup>7</sup> -K1-K1 <sup>1</sup> | 64.60(3)       | N1 <sup>2</sup> -K1-N2               | 113.33(3)      |
| N2 <sup>7</sup> -K1-K1 <sup>2</sup> | 134.01(3)      | N1 <sup>6</sup> -K1-N2               | 132.43(3)      |
| N2 <sup>5</sup> -K1-K1 <sup>1</sup> | 68.64(3)       | N1-K1-N2 <sup>7</sup>                | 162.20(4)      |
| N2 <sup>8</sup> -K1-K1 <sup>1</sup> | 134.01(3)      | N1 <sup>5</sup> -K1-N2 <sup>5</sup>  | 23.10(3)       |
| N2 <sup>8</sup> -K1-K1 <sup>2</sup> | 64.60(3)       | N1 <sup>5</sup> -K1-N1 <sup>6</sup>  | 92.90(4)       |
| N2 <sup>5</sup> -K1-K1 <sup>2</sup> | 128.39(3)      | N1 <sup>6</sup> -K1-N1 <sup>2</sup>  | 25.55(4)       |
| N2 <sup>7</sup> -K1-N3 <sup>4</sup> | 125.27(3)      | N1-K1-N1 <sup>5</sup>                | 120.27(6)      |
| N2 <sup>8</sup> -K1-N3 <sup>4</sup> | 125.27(3)      | N1 <sup>5</sup> -K1-N1 <sup>2</sup>  | 115.73(3)      |
| N2 <sup>8</sup> -K1-N3 <sup>3</sup> | 79.18(4)       | N1-K1-N1 <sup>6</sup>                | 115.73(3)      |
| N2 <sup>7</sup> -K1-N3 <sup>3</sup> | 79.18(4)       | N1-K1-N1 <sup>2</sup>                | 92.90(4)       |
| N2 <sup>7</sup> -K1-N2 <sup>5</sup> | 89.94(4)       | K1 <sup>3</sup> -N3-K1 <sup>9</sup>  | 88.65(5)       |
| N2 <sup>7</sup> -K1-N2              | 154.75(2)      | N2-N3-K1 <sup>9</sup>                | 119.42(9)      |
| N2 <sup>8</sup> -K1-N2 <sup>5</sup> | 154.75(2)      | N2-N3-K1 <sup>3</sup>                | 109.78(9)      |
| N2-K1-N2 <sup>5</sup>               | 78.11(5)       | N2 <sup>10</sup> -N2-K1 <sup>9</sup> | 119.42(9)      |
| N2 <sup>7</sup> -K1-N2 <sup>8</sup> | 91.87(6)       | N2 <sup>10</sup> -N3-K1 <sup>3</sup> | 109.77(9)      |
| N2 <sup>8</sup> -K1-N2              | 89.94(4)       | N2 <sup>10</sup> -N3-N2              | 107.68(17)     |
| N2 <sup>7</sup> -K1-N1 <sup>6</sup> | 72.72(3)       | K1 <sup>11</sup> -N2-K1              | 83.90(4)       |
| N2 <sup>7</sup> -K1-N1 <sup>2</sup> | 91.19(3)       | N3-N2-K1                             | 161.06(10)     |
| N2 <sup>8</sup> -K1-N1 <sup>2</sup> | 72.72(3)       | N3-N2-K1 <sup>11</sup>               | 115.04(10)     |
| N2 <sup>8</sup> -K1-N1 <sup>6</sup> | 91.19(3)       | N1-N2-K1 <sup>11</sup>               | 118.50(9)      |
| N1-K1-K1 <sup>2</sup>               | 47.45(4)       | N1-N2-K1                             | 59.49(7)       |
| N1 <sup>6</sup> -K1-K1 <sup>2</sup> | 69.16(3)       | N1-N2-N3                             | 107.99(11)     |
| N1-K1-K1 <sup>1</sup>               | 132.84(4)      | K1-N1-K1 <sup>2</sup>                | 87.10(4)       |
| N1 <sup>5</sup> -K1-K1 <sup>2</sup> | 132.84(4)      | N2-N1-K1 <sup>2</sup>                | 152.85(10)     |
| N1 <sup>5</sup> -K1-K1 <sup>1</sup> | 47.45(4)       | N2-N1-K1                             | 97.41(8)       |
| N1 <sup>6</sup> -K1-K1 <sup>1</sup> | 45.45(2)       | N2-N1-N1 <sup>10</sup>               | 108.17(7)      |
| N1 <sup>2</sup> -K1-K1 <sup>1</sup> | 69.16(3)       | N1 <sup>10</sup> -N1-K1 <sup>2</sup> | 77.22(2)       |
| N1 <sup>2</sup> -K1-K1 <sup>2</sup> | 45.45(2)       | N1 <sup>10</sup> -N1-K1              | 150.13(3)      |

<sup>1</sup>1-X,2-Y,2-Z; <sup>2</sup>1-X,1-Y,2-Z; <sup>3</sup>1-X,1-Y,1-Z; <sup>4</sup>1/2-X,1-Y,1/2+Z; <sup>5</sup>+X,3/2-Y,+Z; <sup>6</sup>1-X,1/2+Y,2-Z; <sup>7</sup>1/2+X,3/2-Y,3/2-Z;  
<sup>8</sup>1/2+X,+Y,3/2-Z; <sup>9</sup>1/2-X,1-Y,-1/2+Z; <sup>10</sup>+X,1/2-Y,+Z; <sup>11</sup>-1/2+X,+Y,3/2-Z

## 2. Single-crystal X-ray diffraction analysis of **3**

Table S4. Crystal data and structure refinement for **3**

| <b>3</b>                                                     |                                                                             |
|--------------------------------------------------------------|-----------------------------------------------------------------------------|
| CCDC                                                         | 1887029                                                                     |
| Empirical formula                                            | H <sub>4</sub> N <sub>6</sub>                                               |
| Formula weight                                               | 88.09                                                                       |
| Temperature / K                                              | 150                                                                         |
| Crystal system                                               | Orthorhombic                                                                |
| Space group                                                  | <i>Pcca</i>                                                                 |
| <i>a</i> / Å                                                 | 9.399(4)                                                                    |
| <i>b</i> / Å                                                 | 3.9543(19)                                                                  |
| <i>c</i> / Å                                                 | 10.362(5)                                                                   |
| $\alpha$ / °                                                 | 90.00                                                                       |
| $\beta$ / °                                                  | 90.00                                                                       |
| $\gamma$ / °                                                 | 90.00                                                                       |
| Volume / Å <sup>3</sup>                                      | 385.1(3)                                                                    |
| <i>Z</i>                                                     | 4                                                                           |
| $\rho_{\text{calc}}$ / g cm <sup>-3</sup>                    | 1.519                                                                       |
| $\mu$ / mm <sup>-1</sup>                                     | 0.125                                                                       |
| <i>F</i> (000)                                               | 184.0                                                                       |
| Crystal size / mm <sup>3</sup>                               | 0.19×0.12×0.08                                                              |
| Radiation                                                    | MoK $\alpha$ ( $\lambda$ = 0.71073)                                         |
| 2 $\theta$ range for data collection/°                       | 7.866 to 52.56                                                              |
| Index ranges                                                 | -11 ≤ <i>h</i> ≤ 10, -4 ≤ <i>k</i> ≤ 4, -12 ≤ <i>l</i> ≤ 12                 |
| Reflections collected                                        | 1871                                                                        |
| Independent reflections                                      | 392 [ <i>R</i> <sub>int</sub> = 0.0746, <i>R</i> <sub>sigma</sub> = 0.0491] |
| Data / restraints / parameters                               | 392 / 1 / 37                                                                |
| Goodness-of-fit on <i>F</i> <sup>2</sup>                     | 1.072                                                                       |
| Final <i>R</i> indexes [ <i>I</i> ≥ 2 $\sigma$ ( <i>I</i> )] | <i>R</i> <sub>1</sub> = 0.0497, <i>wR</i> <sub>2</sub> = 0.1243             |
| Final <i>R</i> indexes [all data]                            | <i>R</i> <sub>1</sub> = 0.0587, <i>wR</i> <sub>2</sub> = 0.1354             |
| Largest diff. peak / hole / e Å <sup>-3</sup>                | 0.34 / -0.22                                                                |

Table S5. Selected bond lengths for **3**

| parameter          | bond length (Å) | parameter | bond length (Å) |
|--------------------|-----------------|-----------|-----------------|
| N3-N3 <sup>1</sup> | 1.316(3)        | N2-N1     | 1.309(2)        |
| N3-N2              | 1.316(2)        |           |                 |

<sup>1</sup><sub>1/2-X,1-Y,+Z</sub>

Table S6. Selected bond angles for **3**

| parameter              | bond angle (°) | parameter              | bond angle (°) |
|------------------------|----------------|------------------------|----------------|
| N3 <sup>1</sup> -N3-N2 | 107.83(10)     | N2 <sup>1</sup> -N1-N2 | 108.2(2)       |
| N1-N2-N3               | 108.05(15)     |                        |                |

<sup>1</sup><sub>1/2-X,1-Y,+Z</sub>

Table S7. Hydrogen atom coordinates ( $\text{\AA} \times 10^4$ ) and isotropic displacement parameters ( $\text{\AA}^2 \times 10^3$ ) for **3**

| Atom | <i>x</i> | <i>y</i> | <i>z</i> | U(eq) |
|------|----------|----------|----------|-------|
| H4A  | 5630(20) | 1780(50) | 2110(20) | 58(7) |
| H4B  | 4560(20) | -700(50) | 1930(19) | 39(5) |

Table S8. Hydrogen bonds for **3**

| Donor--H...Acceptor | D--H ( $\text{\AA}$ ) | H...A ( $\text{\AA}$ ) | D...A ( $\text{\AA}$ ) | D--H...A ( $^\circ$ ) |
|---------------------|-----------------------|------------------------|------------------------|-----------------------|
| N4--H4A...N3        | 0.87(2)               | 2.12(2)                | 2.960(2)               | 163.2(19)             |
| N4--H4B...N2        | 0.874(19)             | 2.11(2)                | 2.982(2)               | 177.4(19)             |

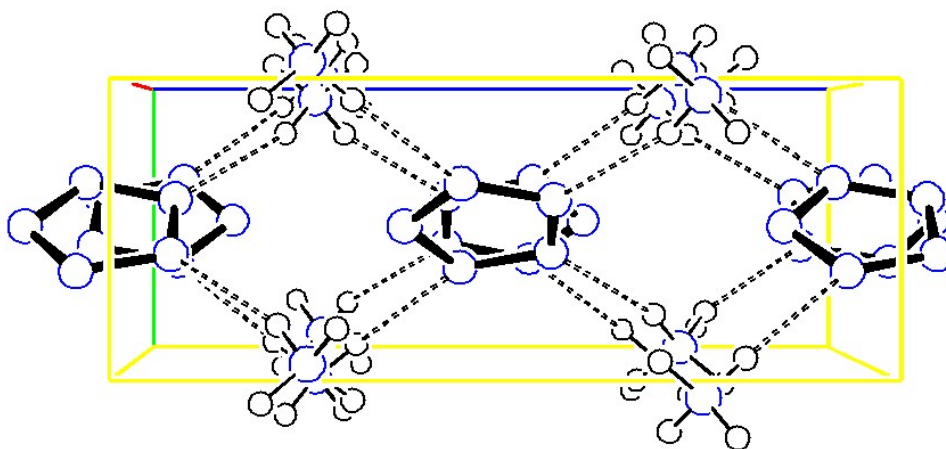

**Fig. S1** Ball and stick packing diagram of **3** viewed down the *a* axis. Unit cell indicated and dashed lines indicate strong hydrogen bonding.

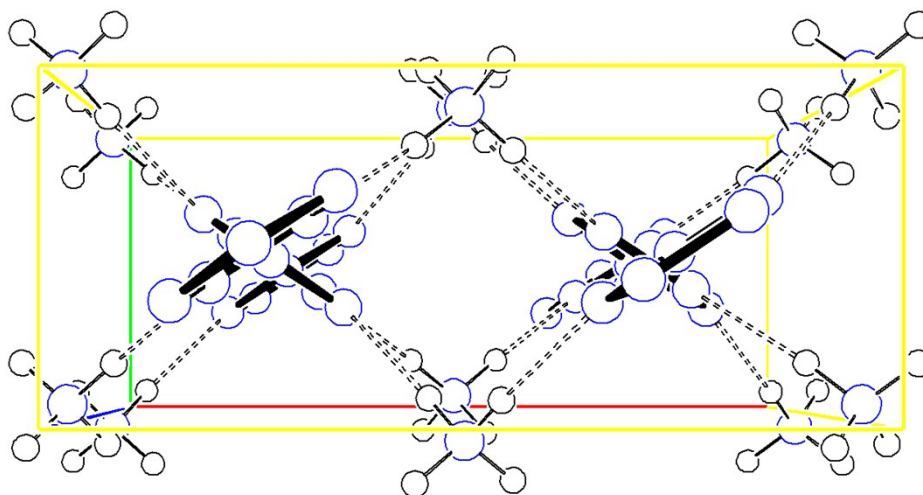

**Fig. S2** Ball and stick packing diagram of **3** viewed down the *c* axis. Unit cell indicated and dashed lines indicate strong hydrogen bonding.

### 3. Single-crystal X-ray diffraction analysis of 4·2H<sub>2</sub>O

Table S9. Crystal data and structure refinement for 4·2H<sub>2</sub>O

|                                                              | 4·2H <sub>2</sub> O                                                          |
|--------------------------------------------------------------|------------------------------------------------------------------------------|
| CCDC                                                         | 1881964                                                                      |
| Empirical formula                                            | H <sub>8</sub> N <sub>6</sub> O <sub>3</sub>                                 |
| Formula weight                                               | 140.12                                                                       |
| Temperature / K                                              | 173                                                                          |
| Crystal system                                               | monoclinic                                                                   |
| Space group                                                  | <i>P</i> 2 <sub>1</sub> / <i>c</i>                                           |
| <i>a</i> / Å                                                 | 3.685(3)                                                                     |
| <i>b</i> / Å                                                 | 14.638(10)                                                                   |
| <i>c</i> / Å                                                 | 11.575(8)                                                                    |
| $\alpha$ / °                                                 | 90.00                                                                        |
| $\beta$ / °                                                  | 90.32(5)                                                                     |
| $\gamma$ / °                                                 | 90.00                                                                        |
| Volume / Å <sup>3</sup>                                      | 624.4(8)                                                                     |
| <i>Z</i>                                                     | 4                                                                            |
| $\rho_{\text{calc}}$ / g cm <sup>-3</sup>                    | 1.491                                                                        |
| $\mu$ / mm <sup>-1</sup>                                     | 0.141                                                                        |
| <i>F</i> (000)                                               | 296.0                                                                        |
| Crystal size / mm <sup>3</sup>                               | 0.40×0.16×0.05                                                               |
| Radiation                                                    | MoK $\alpha$ ( $\lambda$ = 0.71073)                                          |
| 2 $\theta$ range for data collection/°                       | 4.486 to 55.316                                                              |
| Index ranges                                                 | -4 ≤ <i>h</i> ≤ 4, -18 ≤ <i>k</i> ≤ 19, -14 ≤ <i>l</i> ≤ 15                  |
| Reflections collected                                        | 4450                                                                         |
| Independent reflections                                      | 1395 [ <i>R</i> <sub>int</sub> = 0.0598, <i>R</i> <sub>sigma</sub> = 0.0600] |
| Data / restraints / parameters                               | 1395 / 3 / 99                                                                |
| Goodness-of-fit on <i>F</i> <sup>2</sup>                     | 1.009                                                                        |
| Final <i>R</i> indexes [ <i>I</i> ≥ 2 $\sigma$ ( <i>I</i> )] | <i>R</i> <sub>1</sub> = 0.0452, <i>wR</i> <sub>2</sub> = 0.1065              |
| Final <i>R</i> indexes [all data]                            | <i>R</i> <sub>1</sub> = 0.0779, <i>wR</i> <sub>2</sub> = 0.1228              |
| Largest diff. peak / hole / e Å <sup>-3</sup>                | 0.31 / -0.28                                                                 |

Table S10. Selected bond lengths for 4·2H<sub>2</sub>O

| parameter | bond length (Å) | parameter | bond length (Å) |
|-----------|-----------------|-----------|-----------------|
| O1-N6     | 1.410(2)        | N2-N3     | 1.312(2)        |
| N1-N2     | 1.314(2)        | N3-N4     | 1.318(2)        |
| N1-N5     | 1.316(2)        | N4-N5     | 1.316(3)        |

Table S11. Selected bond angles for 4·2H<sub>2</sub>O

| parameter | bond angle (°) | parameter | bond angle (°) |
|-----------|----------------|-----------|----------------|
| N2-N1-N5  | 108.61(16)     | N5-N4-N3  | 107.97(16)     |
| N3-N2-N1  | 107.58(16)     | N1-N5-N4  | 107.54(16)     |
| N2-N3-N4  | 108.30(16)     |           |                |

Table S12. Hydrogen atom coordinates ( $\text{\AA} \times 10^4$ ) and isotropic displacement parameters ( $\text{\AA}^2 \times 10^3$ ) for  $4 \cdot 2\text{H}_2\text{O}$

| Atom | <i>x</i> | <i>y</i> | <i>z</i> | U(eq) |
|------|----------|----------|----------|-------|
| H3A  | 10645    | 6739     | -163     | 46    |
| H3B  | 8299     | 6528     | -1063    | 46    |
| H1   | 709      | 6073     | 4451     | 52    |
| H6A  | 3270     | 5255     | 3141     | 28    |
| H6B  | 642      | 5554     | 2341     | 28    |
| H6C  | 3120(70) | 6218(14) | 2770(20) | 48(8) |
| H2A  | 7570(70) | 4745(19) | 1030(20) | 42(8) |
| H2B  | 7480(80) | 5590(20) | 690(30)  | 54(9) |

Table S13. Hydrogen bonds for  $4 \cdot 2\text{H}_2\text{O}$

| Donor--H...Acceptor | D-H ( $\text{\AA}$ ) | H...A ( $\text{\AA}$ ) | D...A ( $\text{\AA}$ ) | D-H...A ( $^\circ$ ) |
|---------------------|----------------------|------------------------|------------------------|----------------------|
| O1--H1...N3         | 0.84                 | 1.90                   | 2.736(3)               | 177                  |
| O2--H2A...O3        | 0.86(3)              | 1.95(3)                | 2.786(3)               | 164(2)               |
| O2--H2B...O3        | 0.84(3)              | 1.93(3)                | 2.765(3)               | 170(3)               |
| O3--H3A...N4        | 0.85                 | 2.03                   | 2.867(3)               | 170                  |
| O3--H3B...N1        | 0.85                 | 2.06                   | 2.880(3)               | 164                  |
| N6--H6A...N2        | 0.87                 | 2.12                   | 2.947(3)               | 158                  |
| N6--H6B...O2        | 0.87                 | 1.89                   | 2.732(3)               | 165                  |
| N6--H6C...N5        | 0.91(2)              | 2.10(2)                | 2.969(3)               | 161(2)               |



## 4. Single-crystal X-ray diffraction analysis of **5**

Table S14. Crystal data and structure refinement for **5**

| <b>5</b>                                                     |                                                                             |
|--------------------------------------------------------------|-----------------------------------------------------------------------------|
| CCDC                                                         | 1883083                                                                     |
| Empirical formula                                            | H <sub>5</sub> N <sub>7</sub>                                               |
| Formula weight                                               | 103.11                                                                      |
| Temperature / K                                              | 150                                                                         |
| Crystal system                                               | monoclinic                                                                  |
| Space group                                                  | <i>P</i> 2 <sub>1</sub> / <i>c</i>                                          |
| <i>a</i> / Å                                                 | 6.4527(16)                                                                  |
| <i>b</i> / Å                                                 | 12.247(3)                                                                   |
| <i>c</i> / Å                                                 | 5.4073(14)                                                                  |
| $\alpha$ / °                                                 | 90.00                                                                       |
| $\beta$ / °                                                  | 97.766(6)                                                                   |
| $\gamma$ / °                                                 | 90.00                                                                       |
| Volume / Å <sup>3</sup>                                      | 423.40(19)                                                                  |
| <i>Z</i>                                                     | 4                                                                           |
| $\rho_{\text{calc}}$ / g cm <sup>-3</sup>                    | 1.618                                                                       |
| $\mu$ / mm <sup>-1</sup>                                     | 0.133                                                                       |
| <i>F</i> (000)                                               | 216.0                                                                       |
| Crystal size / mm <sup>3</sup>                               | 0.19×0.12×0.08                                                              |
| Radiation                                                    | MoK $\alpha$ ( $\lambda$ = 0.71073)                                         |
| 2 $\theta$ range for data collection/°                       | 6.372 to 53.338                                                             |
| Index ranges                                                 | -8 ≤ <i>h</i> ≤ 8, -15 ≤ <i>k</i> ≤ 15, -6 ≤ <i>l</i> ≤ 6                   |
| Reflections collected                                        | 3281                                                                        |
| Independent reflections                                      | 890 [ <i>R</i> <sub>int</sub> = 0.0444, <i>R</i> <sub>sigma</sub> = 0.0428] |
| Data / restraints / parameters                               | 890 / 0 / 73                                                                |
| Goodness-of-fit on <i>F</i> <sup>2</sup>                     | 1.116                                                                       |
| Final <i>R</i> indexes [ <i>I</i> ≥ 2 $\sigma$ ( <i>I</i> )] | <i>R</i> <sub>1</sub> = 0.0406, w <i>R</i> <sub>2</sub> = 0.0971            |
| Final <i>R</i> indexes [all data]                            | <i>R</i> <sub>1</sub> = 0.0490, w <i>R</i> <sub>2</sub> = 0.1008            |
| Largest diff. peak / hole / e Å <sup>-3</sup>                | 0.21 / -0.28                                                                |

Table S15. Selected bond lengths for **5**

| parameter | bond length (Å) | parameter | bond length (Å) |
|-----------|-----------------|-----------|-----------------|
| N2-N1     | 1.4494(17)      | N4-N5     | 1.3261(18)      |
| N3-N4     | 1.3240(18)      | N7-N6     | 1.3277(19)      |
| N3-N7     | 1.3150(17)      | N6-N5     | 1.3206(19)      |

Table S16. Selected bond angles for **5**

| parameter | bond angle (°) | parameter | bond angle (°) |
|-----------|----------------|-----------|----------------|
| N7-N3-N4  | 108.44(12)     | N5-N6-N7  | 108.10(12)     |
| N3-N4-N5  | 107.73(12)     | N6-N5-N4  | 107.91(13)     |
| N3-N7-N6  | 107.81(12)     |           |                |

Table S17. Hydrogen atom coordinates ( $\text{\AA} \times 10^4$ ) and isotropic displacement parameters ( $\text{\AA}^2 \times 10^3$ ) for **5**

| Atom | <i>x</i> | <i>y</i> | <i>z</i> | U(eq) |
|------|----------|----------|----------|-------|
| H1A  | 2058     | 7021     | -1891    | 18    |
| H1B  | 1978     | 5816     | -1582    | 18    |
| H1C  | 3646     | 6462     | -78      | 18    |
| H2A  | 1100(30) | 5992(17) | 2070(40) | 30(5) |
| H2B  | -280(30) | 6603(14) | 420(40)  | 28(5) |

Table S18. Hydrogen bonds for **5**

| Donor--H...Acceptor | D-H ( $\text{\AA}$ ) | H...A ( $\text{\AA}$ ) | D...A ( $\text{\AA}$ ) | D-H...A ( $^\circ$ ) |
|---------------------|----------------------|------------------------|------------------------|----------------------|
| N1--H1A...N2        | 0.91                 | 2.07                   | 2.959(2)               | 165                  |
| N1--H1B...N6        | 0.91                 | 2.58                   | 3.049(2)               | 113                  |
| N1--H1B...N7        | 0.91                 | 2.13                   | 2.9788(19)             | 155                  |
| N1--H1C...N3        | 0.91                 | 2.14                   | 2.9048(18)             | 141                  |
| N1--H1C...N4        | 0.91                 | 2.61                   | 3.0914(19)             | 114                  |
| N2--H2A...N6        | 0.89(2)              | 2.39(2)                | 3.269(2)               | 170.5(18)            |
| N2--H2B...N5        | 0.84(2)              | 2.35(2)                | 3.143(2)               | 157.8(19)            |

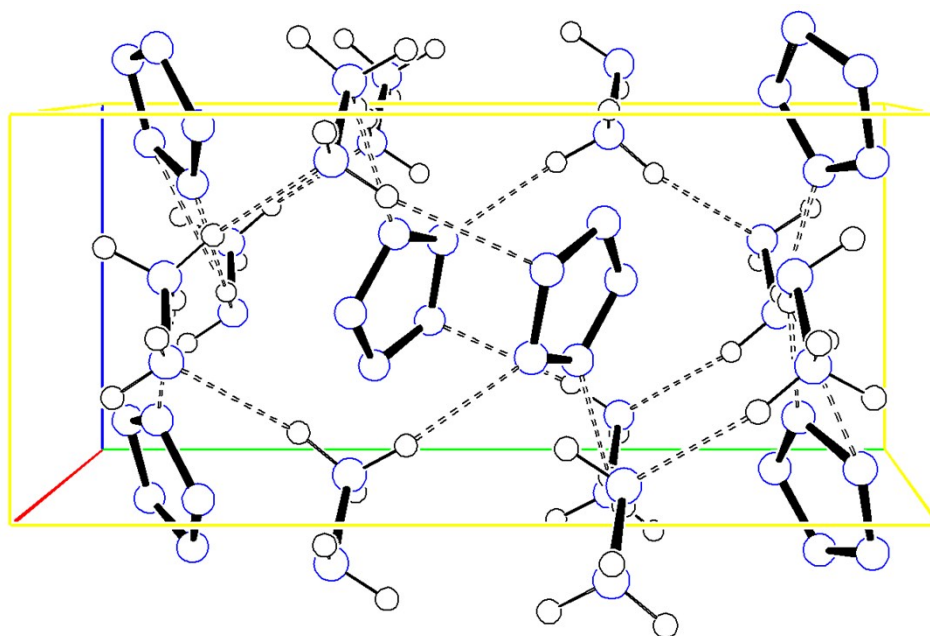

**Fig. S3** Ball and stick packing diagram of **5** viewed down the *a* axis. Unit cell indicated and dashed lines indicate strong hydrogen bonding.

## 5. Single-crystal X-ray diffraction analysis of **6**

Table S19. Crystal data and structure refinement for **6**

| <b>6</b>                                                     |                                                                              |
|--------------------------------------------------------------|------------------------------------------------------------------------------|
| CCDC                                                         | 1885299                                                                      |
| Empirical formula                                            | CH <sub>7</sub> N <sub>9</sub>                                               |
| Formula weight                                               | 145.16                                                                       |
| Temperature / K                                              | 150                                                                          |
| Crystal system                                               | monoclinic                                                                   |
| Space group                                                  | <i>P</i> 2 <sub>1</sub> / <i>n</i>                                           |
| <i>a</i> / Å                                                 | 8.429(5)                                                                     |
| <i>b</i> / Å                                                 | 6.861(5)                                                                     |
| <i>c</i> / Å                                                 | 11.434(8)                                                                    |
| $\alpha$ / °                                                 | 90.00                                                                        |
| $\beta$ / °                                                  | 98.964(12)                                                                   |
| $\gamma$ / °                                                 | 90.00                                                                        |
| Volume / Å <sup>3</sup>                                      | 653.2(8)                                                                     |
| <i>Z</i>                                                     | 4                                                                            |
| $\rho_{\text{calc}}$ / g cm <sup>-3</sup>                    | 1.476                                                                        |
| $\mu$ / mm <sup>-1</sup>                                     | 0.118                                                                        |
| <i>F</i> (000)                                               | 304.0                                                                        |
| Crystal size / mm <sup>3</sup>                               | 0.16×0.05×0.03                                                               |
| Radiation                                                    | MoK $\alpha$ ( $\lambda$ = 0.71073)                                          |
| 2 $\theta$ range for data collection/°                       | 5.608 to 56.144                                                              |
| Index ranges                                                 | -11 ≤ <i>h</i> ≤ 10, -8 ≤ <i>k</i> ≤ 8, -14 ≤ <i>l</i> ≤ 14                  |
| Reflections collected                                        | 3913                                                                         |
| Independent reflections                                      | 1520 [ <i>R</i> <sub>int</sub> = 0.0818, <i>R</i> <sub>sigma</sub> = 0.0918] |
| Data / restraints / parameters                               | 1520 / 1 / 96                                                                |
| Goodness-of-fit on <i>F</i> <sup>2</sup>                     | 1.055                                                                        |
| Final <i>R</i> indexes [ <i>I</i> ≥ 2 $\sigma$ ( <i>I</i> )] | <i>R</i> <sub>1</sub> = 0.0674, w <i>R</i> <sub>2</sub> = 0.1831             |
| Final <i>R</i> indexes [all data]                            | <i>R</i> <sub>1</sub> = 0.1129, w <i>R</i> <sub>2</sub> = 0.2283             |
| Largest diff. peak / hole / e Å <sup>-3</sup>                | 0.29 / -0.41                                                                 |

Table S20. Selected bond lengths for **6**

| parameter | bond length (Å) | parameter | bond length (Å) |
|-----------|-----------------|-----------|-----------------|
| N8-N9     | 1.408(4)        | N4-N3     | 1.319(4)        |
| N8-C1     | 1.324(4)        | N1-N5     | 1.318(4)        |
| N7-C1     | 1.316(4)        | N1-N2     | 1.320(4)        |
| N6-C1     | 1.310(4)        | N3-N2     | 1.304(4)        |
| N4-N5     | 1.314(4)        |           |                 |

Table S21. Selected bond angles for **6**

| parameter | bond angle (°) | parameter | bond angle (°) |
|-----------|----------------|-----------|----------------|
| C1-N8-N9  | 120.0(3)       | N2-N1-N5  | 107.8(2)       |
| N7-C1-N8  | 118.7(3)       | N4-N5-N1  | 107.5(2)       |
| N6-C1-N8  | 120.4(3)       | N2-N3-N4  | 107.7(3)       |

|          |          |          |          |
|----------|----------|----------|----------|
| N6-C1-N7 | 120.9(3) | N3-N2-N1 | 108.5(3) |
| N5-N4-N3 | 108.5(3) |          |          |

Table S22. Selected torsion angles for **6**

| parameter   | torsion angle (°) | parameter   | torsion angle (°) |
|-------------|-------------------|-------------|-------------------|
| N9-N8-C1-N7 | 178.6(3)          | N5-N1-N2-N3 | -0.2(4)           |
| N9-N8-C1-N6 | -1.5(4)           | N3-N4-N5-N1 | 0.2(4)            |
| N4-N3-N2-N1 | 0.3(4)            | N2-N1-N5-N4 | 0.0(4)            |
| N5-N4-N3-N2 | -0.3(3)           |             |                   |

Table S23. Hydrogen atom coordinates ( $\text{\AA} \times 10^4$ ) and isotropic displacement parameters ( $\text{\AA}^2 \times 10^3$ ) for **6**

| Atom | <i>x</i> | <i>y</i> | <i>z</i> | U(eq)  |
|------|----------|----------|----------|--------|
| H8   | 7700.1   | 3360.93  | -298.15  | 30     |
| H7A  | 6355.12  | 6688.59  | 1388.67  | 33     |
| H7B  | 7301.69  | 6378.52  | 371.66   | 33     |
| H6A  | 5346.74  | 4035.09  | 2257.63  | 33     |
| H6B  | 5633.52  | 1992.7   | 1809.48  | 33     |
| H9A  | 6539.43  | 352.51   | -368.85  | 36     |
| H9B  | 8080(30) | 410(80)  | 380(50)  | 98(19) |

Table S24. Hydrogen bonds for **6**

| Donor--H...Acceptor | D-H (Å) | H...A (Å) | D...A (Å) | D-H...A (°) |
|---------------------|---------|-----------|-----------|-------------|
| N6--H6A...N3        | 0.88    | 2.40      | 3.268(5)  | 169         |
| N6--H6A...N4        | 0.88    | 2.58      | 3.288(5)  | 139         |
| N6--H6B...N9        | 0.88    | 2.35      | 2.692(4)  | 103         |
| N6--H6B...N5        | 0.88    | 2.28      | 3.048(4)  | 146         |
| N7--H7A...N4        | 0.88    | 2.07      | 2.911(4)  | 160         |
| N7--H7B...N1        | 0.88    | 2.57      | 3.316(5)  | 143         |
| N7--H7B...N2        | 0.88    | 2.14      | 3.016(4)  | 174         |
| N8--H8...N1         | 0.88    | 2.15      | 2.997(4)  | 162         |
| N9--H9B...N3        | 0.93(3) | 2.52(4)   | 3.207(5)  | 132(4)      |

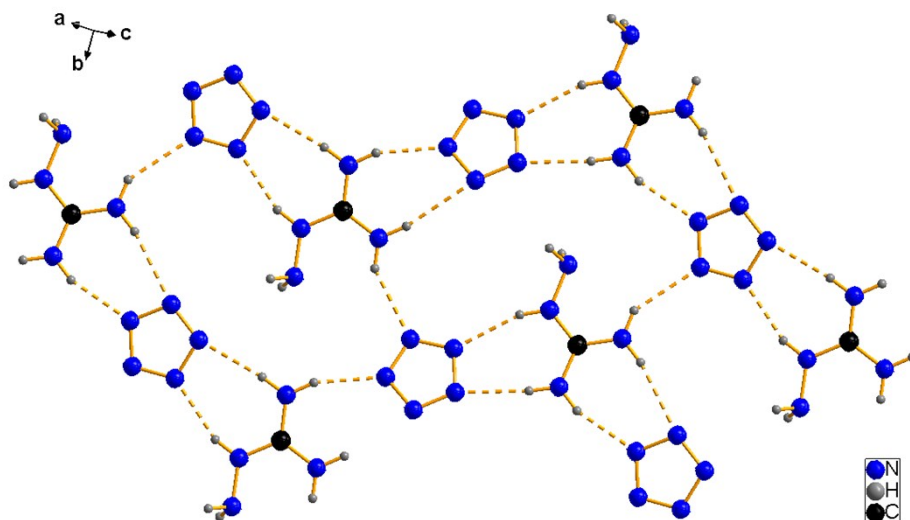

**Fig. S4** A 2D layer formed by aminoguanidinium cations and *cyclo*-N<sub>5</sub><sup>-</sup> anions in the crystal structure of **6**. Dashed lines indicate strong hydrogen bonding.

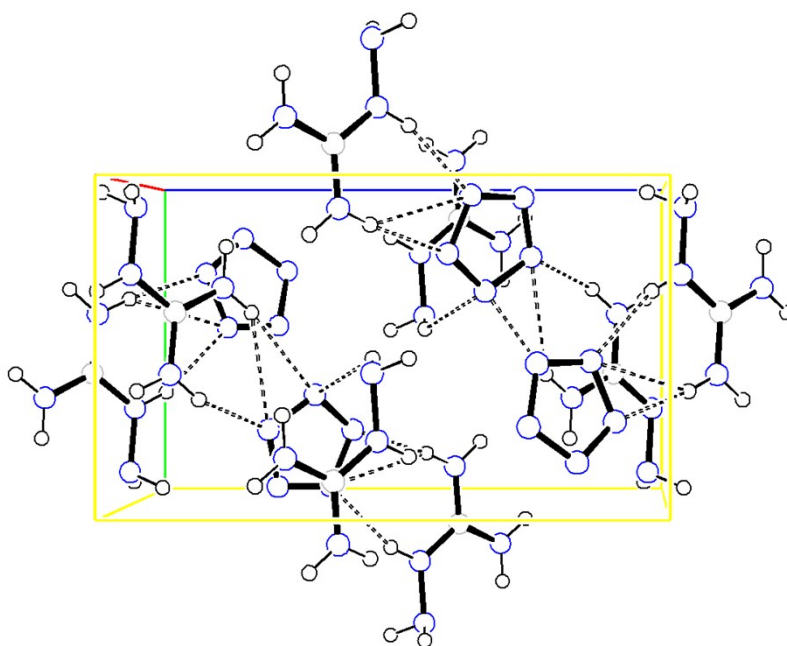

**Fig. S5** Ball and stick packing diagram of **6** viewed down the *a* axis. Unit cell indicated and dashed lines indicate strong hydrogen bonding.

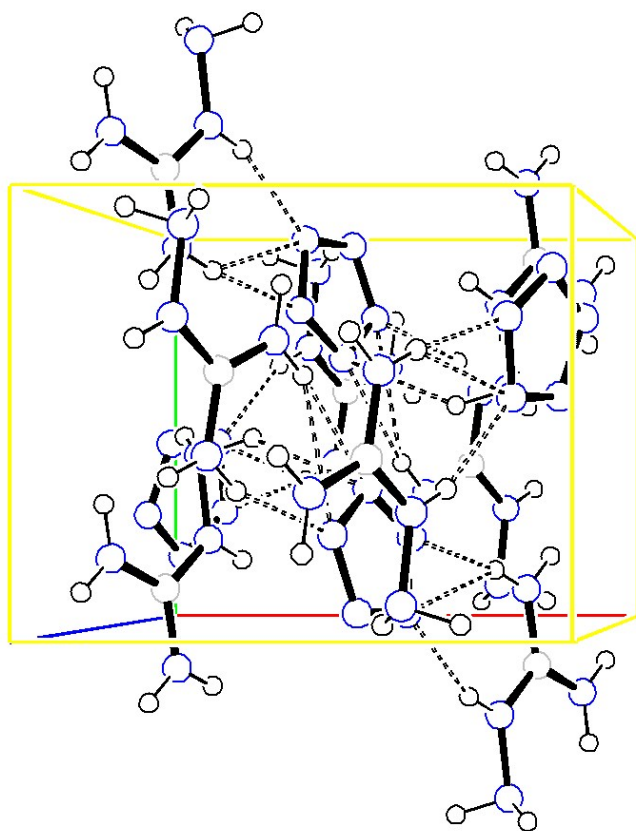

**Fig. S6** Ball and stick packing diagram of **6** viewed down the *c* axis. Unit cell indicated and dashed lines indicate strong hydrogen bonding.

## 6. Single-crystal X-ray diffraction analysis of **7**

Table S25. Crystal data and structure refinement for **7**

|                                           | <b>7</b>                        |
|-------------------------------------------|---------------------------------|
| CCDC                                      | 1883605                         |
| Empirical formula                         | CH <sub>8</sub> N <sub>10</sub> |
| Formula weight                            | 160.17                          |
| Temperature / K                           | 173                             |
| Crystal system                            | triclinic                       |
| Space group                               | <i>P</i> -1                     |
| <i>a</i> / Å                              | 6.2136(13)                      |
| <i>b</i> / Å                              | 7.7039(16)                      |
| <i>c</i> / Å                              | 8.5102(17)                      |
| $\alpha$ / °                              | 71.562(4)                       |
| $\beta$ / °                               | 87.896(4)                       |
| $\gamma$ / °                              | 70.411(4)                       |
| Volume / Å <sup>3</sup>                   | 363.00(13)                      |
| <i>Z</i>                                  | 2                               |
| $\rho_{\text{calc}}$ / g cm <sup>-3</sup> | 1.465                           |
| $\mu$ / mm <sup>-1</sup>                  | 0.117                           |
| <i>F</i> (000)                            | 168.0                           |

|                                                 |                                                                  |
|-------------------------------------------------|------------------------------------------------------------------|
| Crystal size / mm <sup>3</sup>                  | 0.19×0.12×0.05                                                   |
| Radiation                                       | MoK $\alpha$ ( $\lambda = 0.71073$ )                             |
| 2 $\theta$ range for data collection/°          | 5.06 to 53.198                                                   |
| Index ranges                                    | -6 $\leq h \leq$ 7, -9 $\leq k \leq$ 9, -10 $\leq l \leq$ 10     |
| Reflections collected                           | 3058                                                             |
| Independent reflections                         | 1481 [ $R_{\text{int}} = 0.0229$ , $R_{\text{sigma}} = 0.0339$ ] |
| Data / restraints / parameters                  | 1481 / 1 / 111                                                   |
| Goodness-of-fit on $F^2$                        | 1.139                                                            |
| Final $R$ indexes [ $I \geq 2\sigma(I)$ ]       | $R_1 = 0.0388$ , $wR_2 = 0.1151$                                 |
| Final $R$ indexes [all data]                    | $R_1 = 0.0444$ , $wR_2 = 0.1211$                                 |
| Largest diff. peak / hole / e $\text{\AA}^{-3}$ | 0.26 / -0.28                                                     |

Table S26. Selected bond lengths for **7**

| parameter | bond length ( $\text{\AA}$ ) | parameter | bond length ( $\text{\AA}$ ) |
|-----------|------------------------------|-----------|------------------------------|
| N8-N9     | 1.4094(17)                   | N5-N4     | 1.3072(18)                   |
| N8-C1     | 1.3303(17)                   | N1-N5     | 1.3123(19)                   |
| N6-N7     | 1.4137(17)                   | N3-N4     | 1.3153(18)                   |
| N6-C1     | 1.3350(19)                   | N3-N2     | 1.314(2)                     |
| N10-C1    | 1.3236(19)                   | N1-N2     | 1.3168(18)                   |

Table S27. Selected bond angles for **7**

| parameter | bond angle (°) | parameter | bond angle (°) |
|-----------|----------------|-----------|----------------|
| C1-N8-N9  | 117.91(12)     | N2-N1-N5  | 107.71(12)     |
| C1-N6-N7  | 118.75(11)     | N3-N2-N1  | 107.69(12)     |
| N4-N5-N1  | 108.69(12)     | N8-C1-N6  | 119.82(13)     |
| N2-N3-N4  | 108.36(12)     | N10-C1-N8 | 119.94(13)     |
| N5-N4-N3  | 107.54(13)     | N10-C1-N6 | 120.22(12)     |

Table S28. Hydrogen atom coordinates ( $\text{\AA} \times 10^4$ ) and isotropic displacement parameters ( $\text{\AA}^2 \times 10^3$ ) for **7**

| Atom | $x$      | $y$      | $z$      | U(eq) |
|------|----------|----------|----------|-------|
| H8   | 1593     | 8934     | 4391     | 30    |
| H7A  | 1278     | 8196     | 7831     | 32    |
| H7B  | 1606     | 10043    | 7509     | 32    |
| H10A | 7133     | 6433     | 4412     | 38    |
| H10B | 7849     | 6328     | 6144     | 38    |
| H9A  | 3450(30) | 9010(30) | 1980(20) | 34    |
| H9B  | 2960(30) | 7300(30) | 2580(20) | 34    |
| H6   | 5120(30) | 7580(30) | 7750(20) | 40(5) |

Table S29. Hydrogen bonds for **7**

| Donor--H...Acceptor | D-H ( $\text{\AA}$ ) | H...A ( $\text{\AA}$ ) | D...A ( $\text{\AA}$ ) | D-H...A (°) |
|---------------------|----------------------|------------------------|------------------------|-------------|
| N6--H6...N5         | 0.881(18)            | 2.037(17)              | 2.9001(18)             | 166(2)      |
| N7--H7A...N4        | 0.89                 | 2.32                   | 3.047(2)               | 139         |
| N7--H7B...N2        | 0.89                 | 2.36                   | 3.244(2)               | 176         |

|                |           |           |            |           |
|----------------|-----------|-----------|------------|-----------|
| N8--H8...N7    | 0.88      | 2.28      | 3.021(2)   | 142       |
| N9--H9A...N1   | 0.870(19) | 2.268(19) | 3.130(2)   | 171.1(18) |
| N9--H9B...N2   | 0.83(2)   | 2.59(2)   | 3.324(2)   | 147.9(19) |
| N10--H10A...N3 | 0.88      | 2.41      | 3.2667(19) | 164       |
| N10--H10A...N9 | 0.88      | 2.31      | 2.6536(19) | 103       |
| N10--H10B...N3 | 0.88      | 2.16      | 3.0018(19) | 159       |

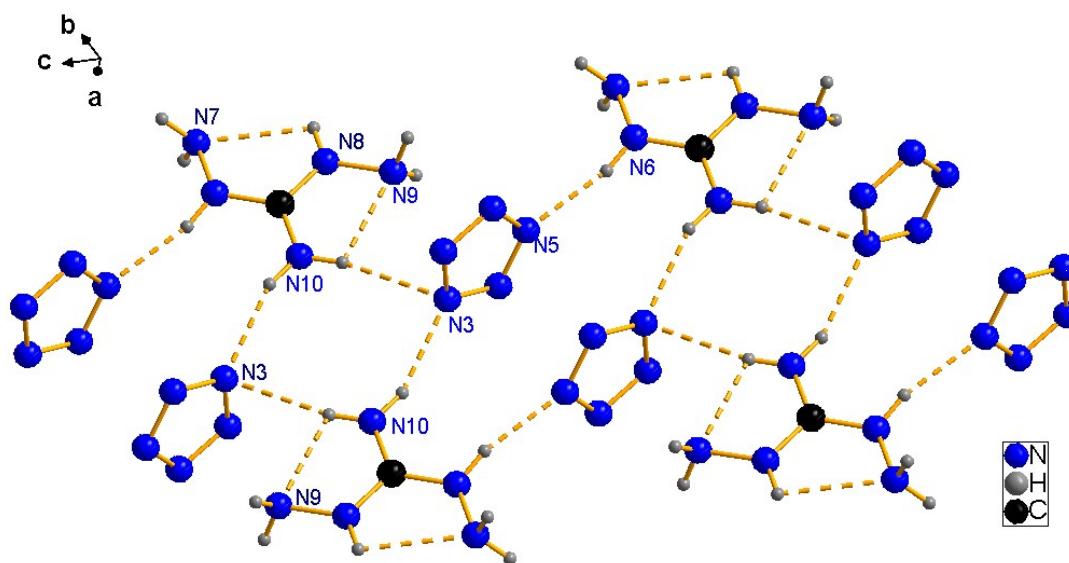

**Fig. S7** A layer-like structure formed by diaminoguanidinium cations and *cyclo-N<sub>5</sub><sup>-</sup>* anions in the crystal structure of **7**. Dashed lines indicate strong hydrogen bonding.

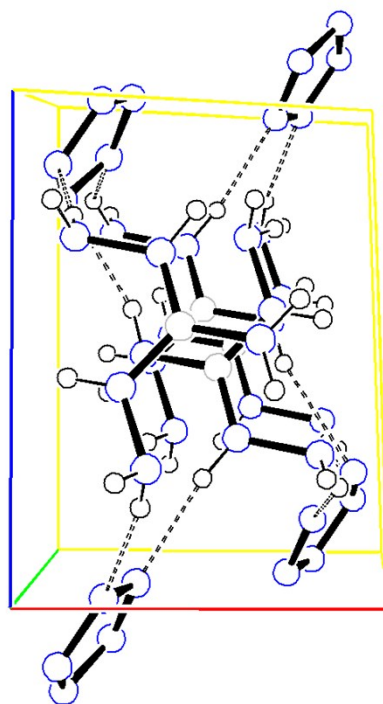

**Fig. S8** Ball and stick packing diagram of **7** viewed down the *b* axis. Unit cell indicated



and dashed lines indicate strong hydrogen bonding.

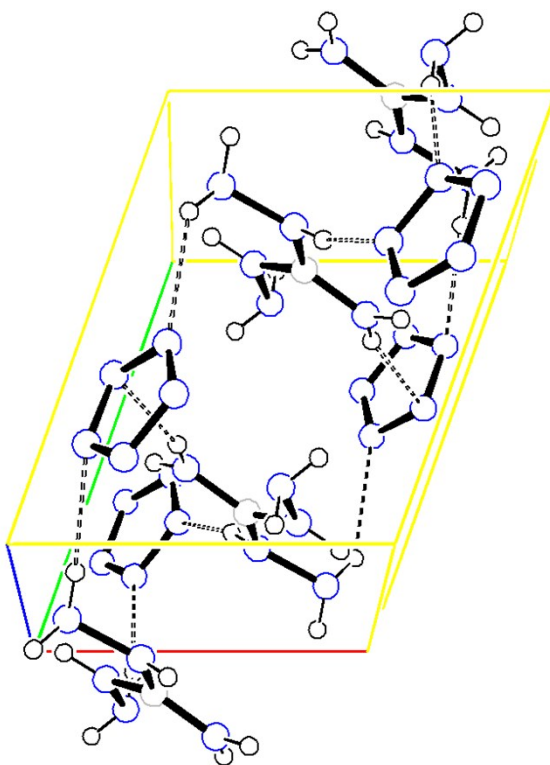

**Fig. S9** Ball and stick packing diagram of **7** viewed down the *c* axis. Unit cell indicated and dashed lines indicate strong hydrogen bonding.

## 7. Single-crystal X-ray diffraction analysis of **8**

Table S30. Crystal data and structure refinement for **8**

|                                           | <b>8</b>                                      |
|-------------------------------------------|-----------------------------------------------|
| CCDC                                      | 1885298                                       |
| Empirical formula                         | C <sub>2</sub> H <sub>8</sub> N <sub>10</sub> |
| Formula weight                            | 172.18                                        |
| Temperature / K                           | 150                                           |
| Crystal system                            | monoclinic                                    |
| Space group                               | <i>P</i> 2 <sub>1</sub> / <i>c</i>            |
| <i>a</i> / Å                              | 3.6171(11)                                    |
| <i>b</i> / Å                              | 20.792(6)                                     |
| <i>c</i> / Å                              | 10.069(3)                                     |
| $\alpha$ / °                              | 90.00                                         |
| $\beta$ / °                               | 97.773(6)                                     |
| $\gamma$ / °                              | 90.00                                         |
| Volume / Å <sup>3</sup>                   | 750.3(4)                                      |
| <i>Z</i>                                  | 4                                             |
| $\rho_{\text{calc}}$ / g cm <sup>-3</sup> | 1.524                                         |
| $\mu$ / mm <sup>-1</sup>                  | 0.119                                         |
| <i>F</i> (000)                            | 360.0                                         |

|                                                 |                                                                |
|-------------------------------------------------|----------------------------------------------------------------|
| Crystal size / mm <sup>3</sup>                  | 0.19×0.12×0.08                                                 |
| Radiation                                       | MoK $\alpha$ ( $\lambda$ = 0.71073)                            |
| 2 $\theta$ range for data collection/°          | 3.918 to 52.742                                                |
| Index ranges                                    | -4 $\leq h \leq$ 4, -25 $\leq k \leq$ 25, -12 $\leq l \leq$ 12 |
| Reflections collected                           | 4400                                                           |
| Independent reflections                         | 1527 [ $R_{\text{int}}$ = 0.0517, $R_{\text{sigma}}$ = 0.0626] |
| Data / restraints / parameters                  | 1527 / 1 / 116                                                 |
| Goodness-of-fit on $F^2$                        | 0.985                                                          |
| Final $R$ indexes [ $I \geq 2\sigma(I)$ ]       | $R_1$ = 0.0432, $wR_2$ = 0.0954                                |
| Final $R$ indexes [all data]                    | $R_1$ = 0.0729, $wR_2$ = 0.1096                                |
| Largest diff. peak / hole / e $\text{\AA}^{-3}$ | 0.20 / -0.22                                                   |

Table S31. Selected bond lengths for **8**

| parameter | bond length ( $\text{\AA}$ ) | parameter | bond length ( $\text{\AA}$ ) |
|-----------|------------------------------|-----------|------------------------------|
| N8-C1     | 1.335(3)                     | N3-N2     | 1.316(2)                     |
| N8-C2     | 1.345(3)                     | N4-N5     | 1.314(2)                     |
| N6-C2     | 1.320(2)                     | N7-C2     | 1.333(3)                     |
| N9-C1     | 1.333(3)                     | N1-N2     | 1.319(2)                     |
| N10-C1    | 1.332(3)                     | N1-N5     | 1.316(2)                     |
| N3-N4     | 1.318(2)                     |           |                              |

Table S32. Selected bond angles for **8**

| parameter | bond angle (°) | parameter | bond angle (°) |
|-----------|----------------|-----------|----------------|
| C1-N8-C2  | 124.29(17)     | N9-C1-N8  | 115.80(18)     |
| N2-N3-N4  | 108.00(16)     | N10-C1-N8 | 126.80(18)     |
| N5-N4-N3  | 107.88(16)     | N10-C1-N9 | 117.38(18)     |
| N5-N1-N2  | 107.79(16)     | N6-C2-N8  | 116.32(18)     |
| N3-N2-N1  | 108.04(16)     | N6-C2-N7  | 118.66(18)     |
| N4-N5-N1  | 108.28(17)     | N7-C2-N8  | 125.00(18)     |

Table S33. Hydrogen atom coordinates ( $\text{\AA} \times 10^4$ ) and isotropic displacement parameters ( $\text{\AA}^2 \times 10^3$ ) for **8**

| Atom | x        | y        | z        | U(eq) |
|------|----------|----------|----------|-------|
| H6A  | 4720.26  | 7012.26  | 5073.27  | 25    |
| H6B  | 4696.62  | 6378.53  | 5833.01  | 25    |
| H9A  | 239.04   | 4379.67  | 2699.96  | 24    |
| H9B  | -303.19  | 4594.55  | 4107.93  | 24    |
| H10A | 2492.74  | 5051.4   | 1270.35  | 24    |
| H10B | 3546.24  | 5741.8   | 1665.8   | 24    |
| H7A  | 2410(60) | 7102(9)  | 2900(20) | 25    |
| H7B  | 190(70)  | 6505(12) | 2180(20) | 50(8) |

Table S34. Hydrogen bonds for **8**

| Donor--H...Acceptor | D-H ( $\text{\AA}$ ) | H...A ( $\text{\AA}$ ) | D...A ( $\text{\AA}$ ) | D-H...A (°) |
|---------------------|----------------------|------------------------|------------------------|-------------|
| N6--H6A...N1        | 0.88                 | 2.61                   | 3.363(3)               | 144         |

|                |           |           |          |           |
|----------------|-----------|-----------|----------|-----------|
| N6--H6A...N5   | 0.88      | 2.13      | 3.001(3) | 173       |
| N6--H6B...N2   | 0.88      | 2.31      | 3.081(3) | 147       |
| N7--H7A...N1   | 0.942(19) | 2.146(19) | 3.057(3) | 162.6(17) |
| N7--H7B...N10  | 0.92(2)   | 2.57(3)   | 2.893(3) | 100.8(18) |
| N7--H7B...N4   | 0.92(2)   | 2.19(2)   | 3.077(3) | 162(2)    |
| N9--H9A...N2   | 0.88      | 2.54      | 3.185(3) | 130       |
| N9--H9A...N3   | 0.88      | 2.53      | 3.268(3) | 142       |
| N9--H9B...N8   | 0.88      | 2.06      | 2.939(3) | 175       |
| N10--H10A...N3 | 0.88      | 2.35      | 3.124(3) | 147       |
| N10--H10B...N7 | 0.88      | 2.36      | 2.893(3) | 119       |
| N10--H10B...N4 | 0.88      | 2.37      | 3.164(3) | 150       |

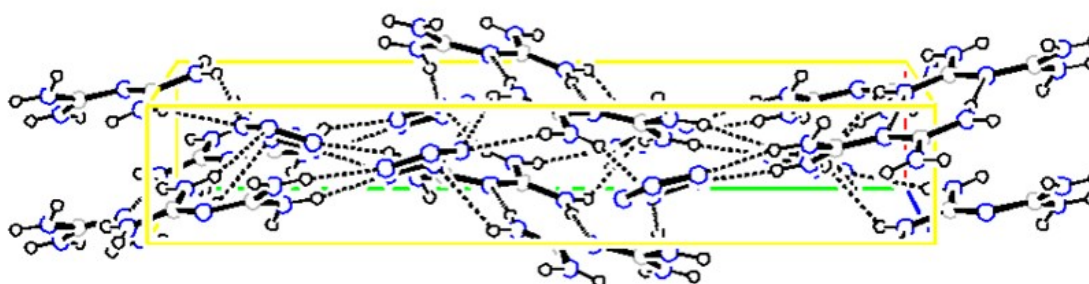

**Fig. S10** Ball and stick packing diagram of **8** viewed down the *c* axis. Unit cell indicated and dashed lines indicate strong hydrogen bonding.

## 8. Single-crystal X-ray diffraction analysis of **9**

Table S35. Crystal data and structure refinement for **9**

| <b>9</b>                                  |                                               |
|-------------------------------------------|-----------------------------------------------|
| CCDC                                      | 1883082                                       |
| Empirical formula                         | C <sub>2</sub> H <sub>6</sub> N <sub>10</sub> |
| Formula weight                            | 170.17                                        |
| Temperature / K                           | 150                                           |
| Crystal system                            | triclinic                                     |
| Space group                               | <i>P</i> -1                                   |
| <i>a</i> / Å                              | 5.298(2)                                      |
| <i>b</i> / Å                              | 7.156(3)                                      |
| <i>c</i> / Å                              | 10.106(4)                                     |
| $\alpha$ / °                              | 100.047(8)                                    |
| $\beta$ / °                               | 104.076(7)                                    |
| $\gamma$ / °                              | 104.089(7)                                    |
| Volume / Å <sup>3</sup>                   | 349.2(2)                                      |
| <i>Z</i>                                  | 2                                             |
| $\rho_{\text{calc}}$ / g cm <sup>-3</sup> | 1.618                                         |
| $\mu$ / mm <sup>-1</sup>                  | 0.128                                         |
| <i>F</i> (000)                            | 176.0                                         |

|                                                 |                                                                  |
|-------------------------------------------------|------------------------------------------------------------------|
| Crystal size / mm <sup>3</sup>                  | 0.19×0.05×0.02                                                   |
| Radiation                                       | MoK $\alpha$ ( $\lambda = 0.71073$ )                             |
| 2 $\theta$ range for data collection/°          | 4.29 to 50.996                                                   |
| Index ranges                                    | -6 $\leq h \leq$ 5, -8 $\leq k \leq$ 8, -12 $\leq l \leq$ 12     |
| Reflections collected                           | 2529                                                             |
| Independent reflections                         | 1271 [ $R_{\text{int}} = 0.0366$ , $R_{\text{sigma}} = 0.0591$ ] |
| Data / restraints / parameters                  | 1271 / 2 / 117                                                   |
| Goodness-of-fit on $F^2$                        | 1.015                                                            |
| Final $R$ indexes [ $I \geq 2\sigma(I)$ ]       | $R_1 = 0.0448$ , $wR_2 = 0.1237$                                 |
| Final $R$ indexes [all data]                    | $R_1 = 0.0704$ , $wR_2 = 0.1319$                                 |
| Largest diff. peak / hole / e $\text{\AA}^{-3}$ | 0.24 / -0.25                                                     |

Table S36. Selected bond lengths for **9**

| parameter | bond length ( $\text{\AA}$ ) | parameter | bond length ( $\text{\AA}$ ) |
|-----------|------------------------------|-----------|------------------------------|
| N6-N7     | 1.386(3)                     | N7-C2     | 1.288(3)                     |
| N6-C1     | 1.329(3)                     | N5-N1     | 1.313(3)                     |
| N10-C1    | 1.312(3)                     | N5-N4     | 1.323(3)                     |
| N8-N9     | 1.405(3)                     | N1-N2     | 1.320(3)                     |
| N8-C1     | 1.351(3)                     | N2-N3     | 1.323(3)                     |
| N8-C2     | 1.376(3)                     | N4-N3     | 1.319(3)                     |

Table S37. Selected bond angles for **9**

| parameter | bond angle (°) | parameter | bond angle (°) |
|-----------|----------------|-----------|----------------|
| C1-N6-N7  | 111.76(19)     | N1-N2-N3  | 108.1(2)       |
| C1-N8-N9  | 121.1(2)       | N3-N4-N5  | 107.89(19)     |
| C1-N8-C2  | 107.11(19)     | N4-N3-N2  | 107.8(2)       |
| C2-N8-N9  | 131.8(2)       | N6-C1-N8  | 105.5(2)       |
| C2-N7-N6  | 104.16(19)     | N10-C1-N6 | 129.3(2)       |
| N1-N5-N4  | 108.2(2)       | N10-C1-N8 | 125.2(2)       |
| N5-N1-N2  | 108.0(2)       | N7-C2-N8  | 111.5(2)       |

Table S38. Hydrogen atom coordinates ( $\text{\AA} \times 10^4$ ) and isotropic displacement parameters ( $\text{\AA}^2 \times 10^3$ ) for **9**

| Atom | $x$      | $y$      | $z$      | U(eq)  |
|------|----------|----------|----------|--------|
| H6   | 2783     | 6398     | 4885     | 26     |
| H10A | 7753     | 8660     | 5490     | 30     |
| H10B | 9463     | 9107     | 7022     | 30     |
| H2   | 2712     | 5470     | 8519     | 26     |
| H9A  | 7760(70) | 8540(40) | 9810(30) | 53(10) |
| H9B  | 8670(60) | 6950(30) | 9380(30) | 44(9)  |

Table S39. Hydrogen bonds for **9**

| Donor--H...Acceptor | D-H ( $\text{\AA}$ ) | H...A ( $\text{\AA}$ ) | D...A ( $\text{\AA}$ ) | D-H...A (°) |
|---------------------|----------------------|------------------------|------------------------|-------------|
| N6--H6...N4         | 0.88                 | 2.16                   | 2.956(3)               | 151         |
| N6--H6...N7         | 0.88                 | 2.36                   | 2.902(3)               | 120         |

|                |         |         |          |        |
|----------------|---------|---------|----------|--------|
| N9--H9A...N2   | 0.89(3) | 2.59(4) | 3.320(3) | 140(3) |
| N9--H9B...N3   | 0.89(3) | 2.58(2) | 3.272(4) | 136(2) |
| N10--H10A...N5 | 0.88    | 2.11    | 2.958(3) | 160    |
| N10--H10B...N9 | 0.88    | 2.55    | 2.837(3) | 100    |
| N10--H10B...N1 | 0.88    | 2.18    | 2.990(3) | 152    |

## 9. Single-crystal X-ray diffraction analysis of **10**

Table S40. Crystal data and structure refinement for **10**

| <b>10</b>                                                    |                                                                              |
|--------------------------------------------------------------|------------------------------------------------------------------------------|
| CCDC                                                         | 1884809                                                                      |
| Empirical formula                                            | C <sub>3</sub> H <sub>7</sub> N <sub>13</sub>                                |
| Formula weight                                               | 225.22                                                                       |
| Temperature / K                                              | 173                                                                          |
| Crystal system                                               | monoclinic                                                                   |
| Space group                                                  | <i>P</i> 2 <sub>1</sub> / <i>c</i>                                           |
| <i>a</i> / Å                                                 | 8.083(3)                                                                     |
| <i>b</i> / Å                                                 | 7.141(2)                                                                     |
| <i>c</i> / Å                                                 | 16.094(5)                                                                    |
| $\alpha$ / °                                                 | 90.00                                                                        |
| $\beta$ / °                                                  | 101.864(7)                                                                   |
| $\gamma$ / °                                                 | 90.00                                                                        |
| Volume / Å <sup>3</sup>                                      | 909.2(5)                                                                     |
| <i>Z</i>                                                     | 4                                                                            |
| $\rho_{\text{calc}}$ / g cm <sup>-3</sup>                    | 1.645                                                                        |
| $\mu$ / mm <sup>-1</sup>                                     | 0.129                                                                        |
| <i>F</i> (000)                                               | 464.0                                                                        |
| Crystal size / mm <sup>3</sup>                               | 0.12×0.06×0.03                                                               |
| Radiation                                                    | MoK $\alpha$ ( $\lambda$ = 0.71073)                                          |
| 2 $\theta$ range for data collection/°                       | 5.15 to 54.374                                                               |
| Index ranges                                                 | -10 ≤ <i>h</i> ≤ 10, -8 ≤ <i>k</i> ≤ 9, -19 ≤ <i>l</i> ≤ 20                  |
| Reflections collected                                        | 6113                                                                         |
| Independent reflections                                      | 1976 [ <i>R</i> <sub>int</sub> = 0.0690, <i>R</i> <sub>sigma</sub> = 0.0700] |
| Data / restraints / parameters                               | 1976 / 1 / 154                                                               |
| Goodness-of-fit on <i>F</i> <sup>2</sup>                     | 0.984                                                                        |
| Final <i>R</i> indexes [ <i>I</i> ≥ 2 $\sigma$ ( <i>I</i> )] | <i>R</i> <sub>1</sub> = 0.0573, <i>wR</i> <sub>2</sub> = 0.1297              |
| Final <i>R</i> indexes [all data]                            | <i>R</i> <sub>1</sub> = 0.1046, <i>wR</i> <sub>2</sub> = 0.1515              |
| Largest diff. peak / hole / e Å <sup>-3</sup>                | 0.23 / -0.25                                                                 |

Table S41. Selected bond lengths for **10**

| parameter | bond length (Å) | parameter | bond length (Å) |
|-----------|-----------------|-----------|-----------------|
| N9-N10    | 1.402(3)        | N7-C1     | 1.344(3)        |
| N9-C2     | 1.344(3)        | N13-C3    | 1.326(3)        |
| N9-C1     | 1.341(3)        | N1-N2     | 1.301(3)        |
| N11-N12   | 1.400(3)        | N1-N5     | 1.314(3)        |
| N11-C2    | 1.353(3)        | N4-N3     | 1.309(3)        |
| N11-C3    | 1.394(3)        | N4-N5     | 1.313(3)        |

|        |          |       |          |
|--------|----------|-------|----------|
| N8-N7  | 1.408(3) | N3-N2 | 1.312(3) |
| N8-C2  | 1.309(3) | N6-C1 | 1.307(3) |
| N10-C3 | 1.315(3) |       |          |

Table S42. Selected bond angles for **10**

| parameter  | bond angle (°) | parameter  | bond angle (°) |
|------------|----------------|------------|----------------|
| C2-N9-N10  | 113.8(2)       | N1-N2-N3   | 107.8(2)       |
| C1-N9-N10  | 137.9(2)       | N4-N5-N1   | 107.5(2)       |
| C1-N9-C2   | 108.2(2)       | N9-C2-N11  | 105.4(2)       |
| C2-N11-N12 | 129.8(2)       | N8-C2-N9   | 114.4(2)       |
| C2-N11-C3  | 106.1(2)       | N8-C2-N11  | 140.2(2)       |
| C3-N11-N12 | 124.0(2)       | N10-C3-N11 | 113.8(2)       |
| C2-N8-N7   | 99.9(2)        | N10-C3-N13 | 124.9(2)       |
| C3-N10-N9  | 100.92(19)     | N13-C3-N11 | 121.4(2)       |
| C1-N7-N8   | 113.8(2)       | N9-C1-N7   | 103.7(2)       |
| N2-N1-N5   | 108.6(2)       | N6-C1-N9   | 127.4(2)       |
| N3-N4-N5   | 108.0(2)       | N6-C1-N7   | 128.9(3)       |
| N4-N3-N2   | 108.2(2)       |            |                |

Table S43. Hydrogen atom coordinates ( $\text{\AA} \times 10^4$ ) and isotropic displacement parameters ( $\text{\AA}^2 \times 10^3$ ) for **10**

| Atom | x         | y         | z        | U(eq)  |
|------|-----------|-----------|----------|--------|
| H13A | 9099.1    | 2769.65   | 8368     | 44     |
| H13B | 10383.01  | 4006.92   | 8944.74  | 44     |
| H6A  | 4563.02   | 6710.14   | 6169.31  | 44     |
| H6B  | 4144.99   | 8759.47   | 5959.13  | 44     |
| H12A | 11530.27  | 8229.89   | 8762.68  | 47     |
| H7   | 6140(30)  | 11310(40) | 6782(18) | 38(8)  |
| H12B | 10670(40) | 8210(40)  | 9444(17) | 67(12) |

Table S44. Hydrogen bonds for **10**

| Donor--H...Acceptor | D-H (Å) | H...A (Å) | D...A (Å) | D-H...A (°) |
|---------------------|---------|-----------|-----------|-------------|
| N6--H6A...N1        | 0.88    | 1.99      | 2.851(3)  | 165         |
| N6--H6B...N3        | 0.88    | 2.04      | 2.880(3)  | 158         |
| N7--H7...N2         | 1.00(3) | 1.98(3)   | 2.893(3)  | 151(2)      |
| N12--H12B...N5      | 0.89(3) | 2.54(3)   | 3.123(4)  | 124(2)      |
| N13--H13A...N8      | 0.88    | 2.18      | 3.048(3)  | 170         |
| N13--H13B...N12     | 0.88    | 2.56      | 2.870(3)  | 102         |
| N13--H13B...N4      | 0.88    | 2.13      | 2.925(4)  | 150         |

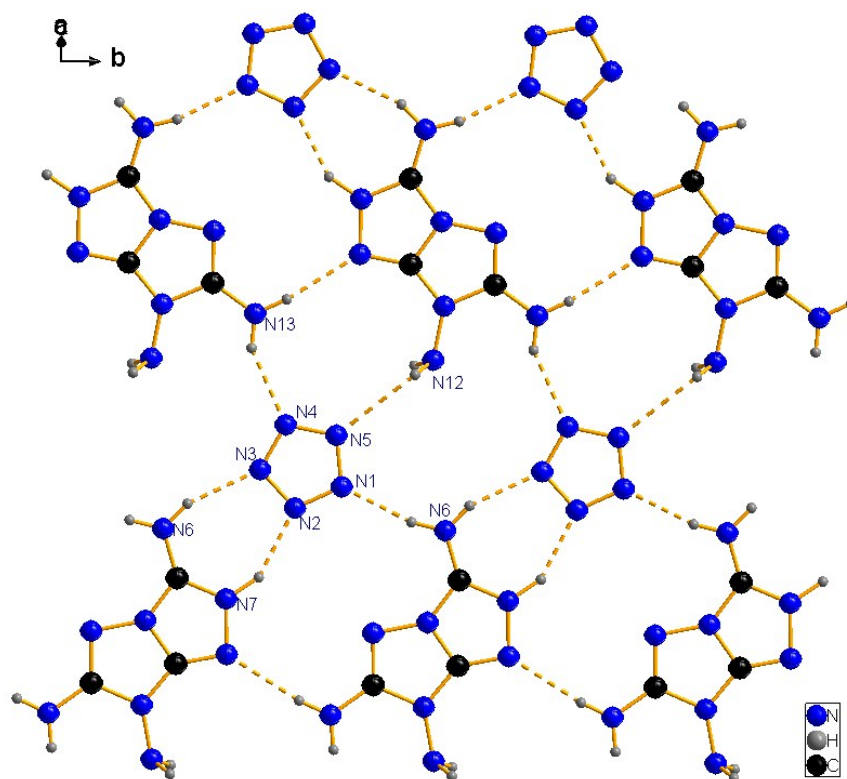

**Fig. S11** A 2D layer formed by fuesd cations and *cyclo*-N<sub>5</sub><sup>-</sup> anions in the crystal structure of **10**. Dashed lines indicate strong hydrogen bonding.

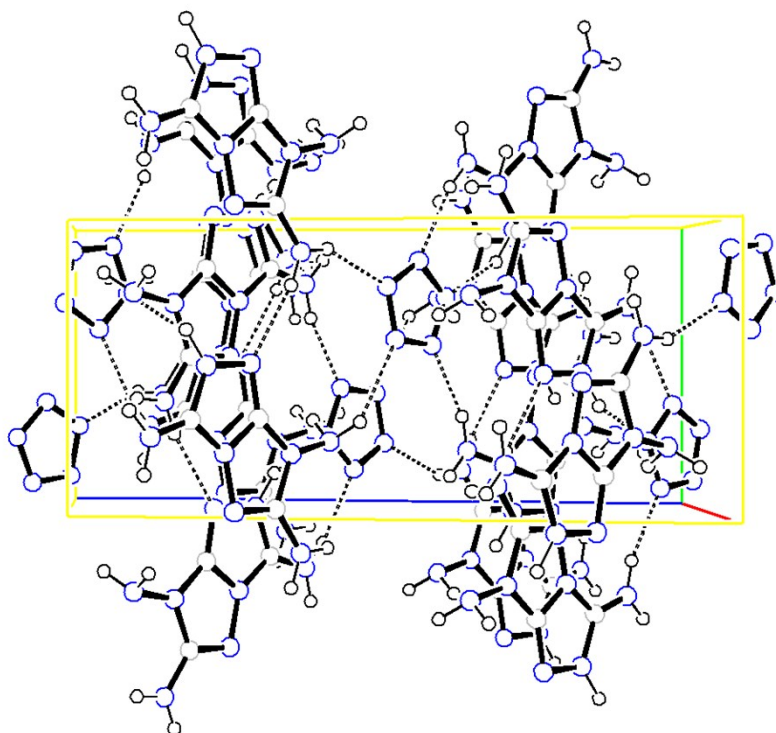

**Fig. S12** Ball and stick packing diagram of **10** viewed down the *a* axis. Unit cell indicated and dashed lines indicate strong hydrogen bonding.

## 10. The noncovalent interactions study<sup>1</sup>

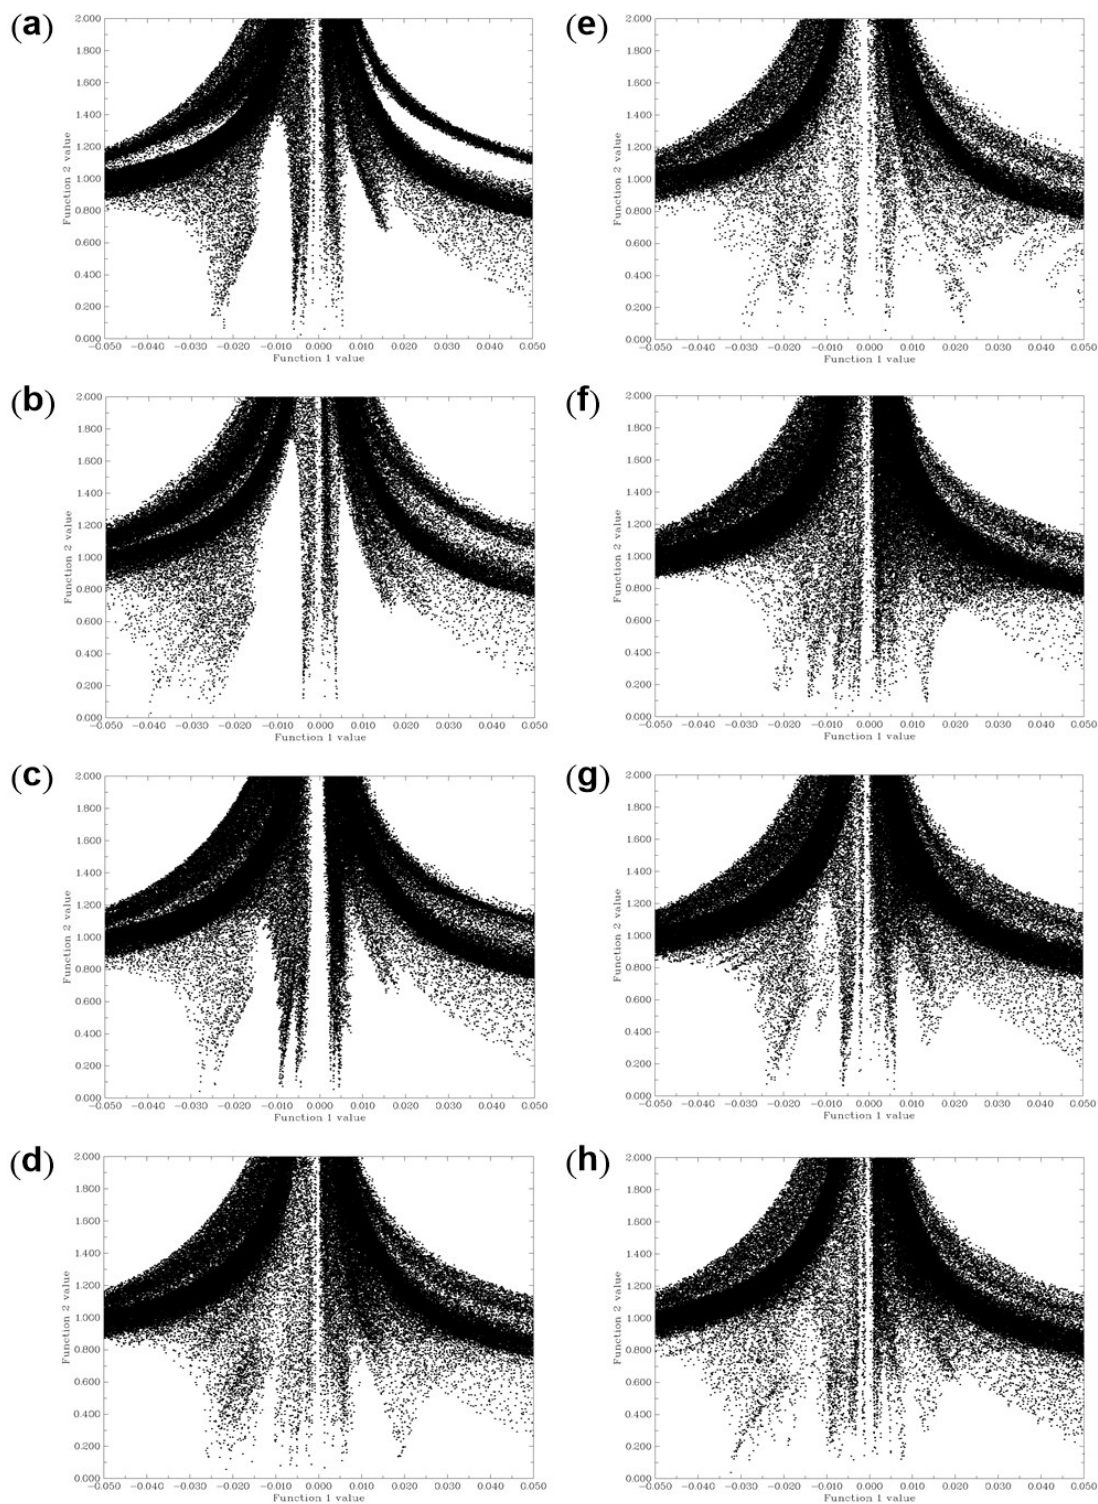

**Fig. S13** (a-h) Plots of the reduced density gradient versus the electron density multiplied by the sign of the second Hessian eigenvalue for **3-10** (**4** is dihydrate). Strong hydrogen bonds:  $-0.05 < \text{Function 1 value} < -0.03$ ; moderate hydrogen bonds:  $-0.03 < \text{Function 1 value} < -0.02$ ; weak hydrogen bonds:  $-0.02 < \text{Function 1 value} < -0.01$ .



## 11. $^1\text{H}$ and $^{13}\text{C}$ NMR spectra

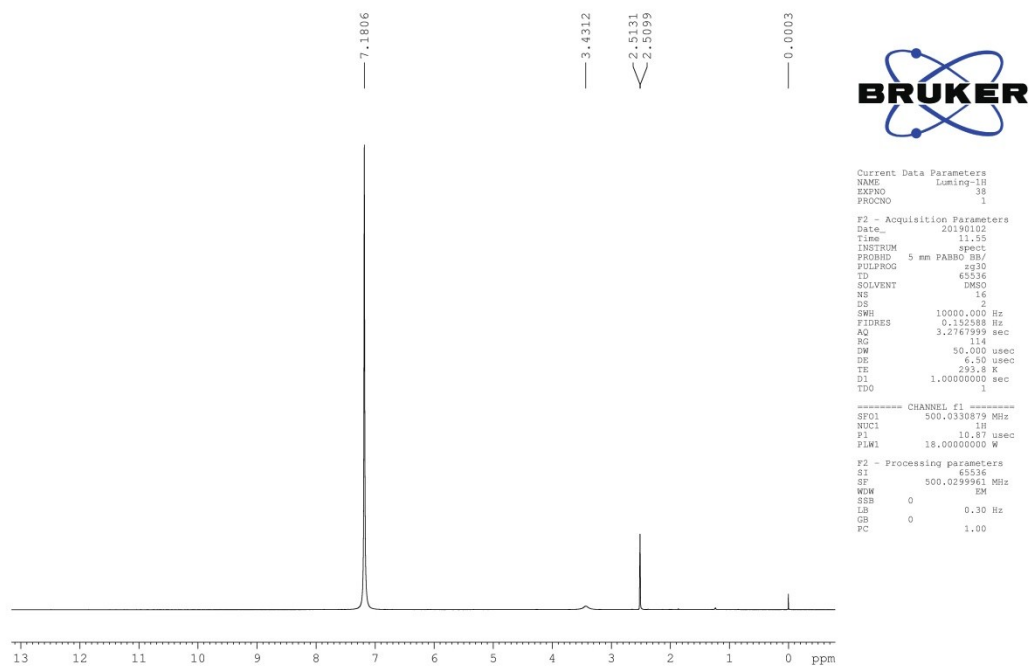

**Fig. S14**  $^1\text{H}$  NMR spectrum of **3** in  $d_6$ -DMSO.

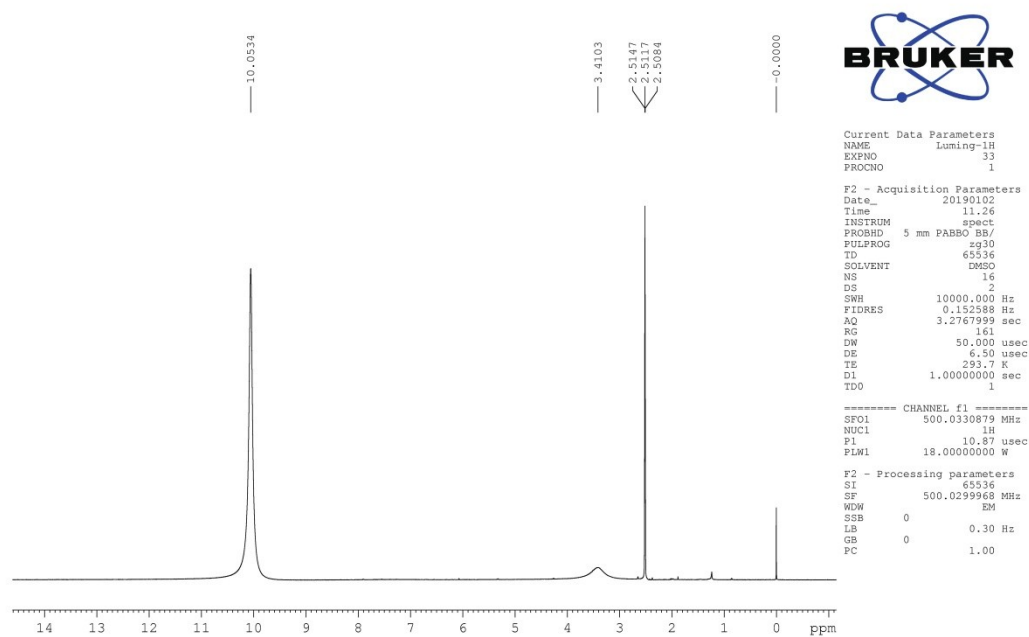

**Fig. S15**  $^1\text{H}$  NMR spectrum of **4** in  $d_6$ -DMSO.

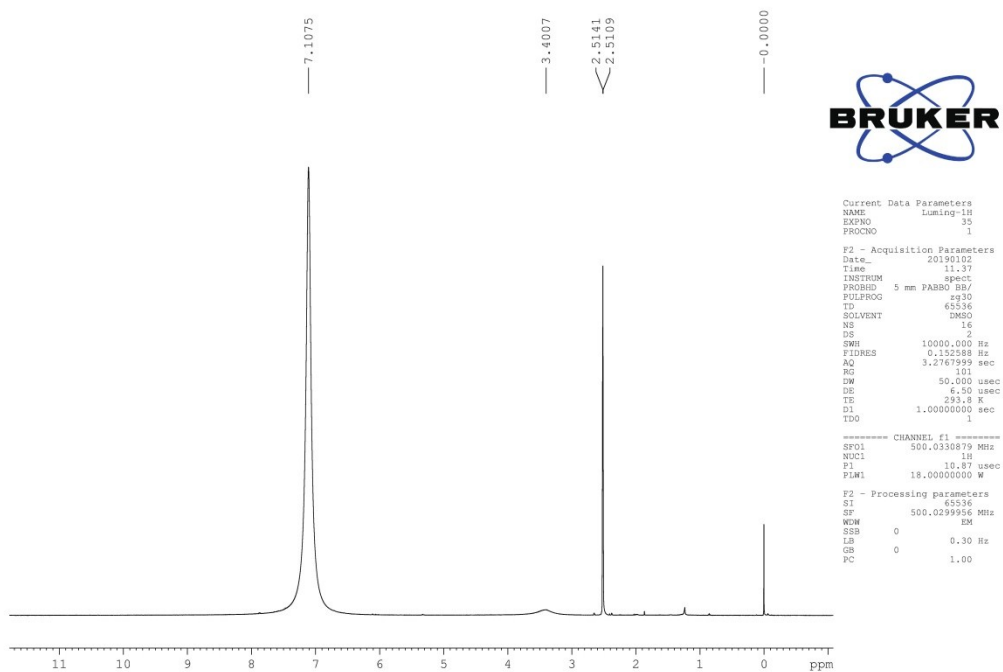

Fig. S16  $^1\text{H}$  NMR spectrum of **5** in  $d_6$ -DMSO.

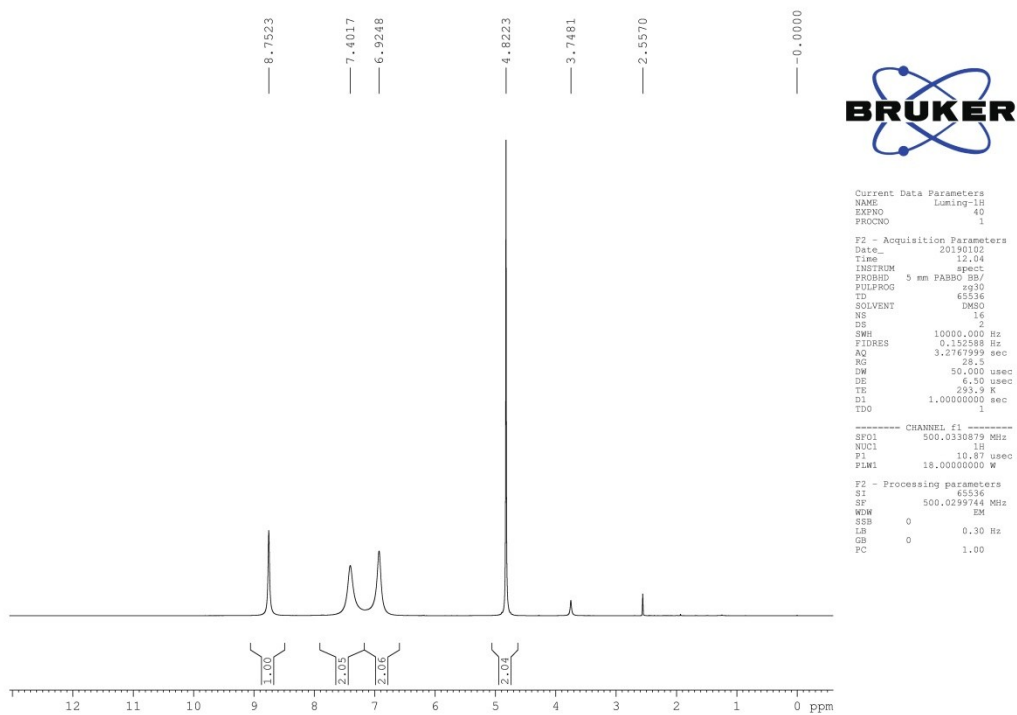

Fig. S17  $^1\text{H}$  NMR spectrum of **6** in  $d_6$ -DMSO.

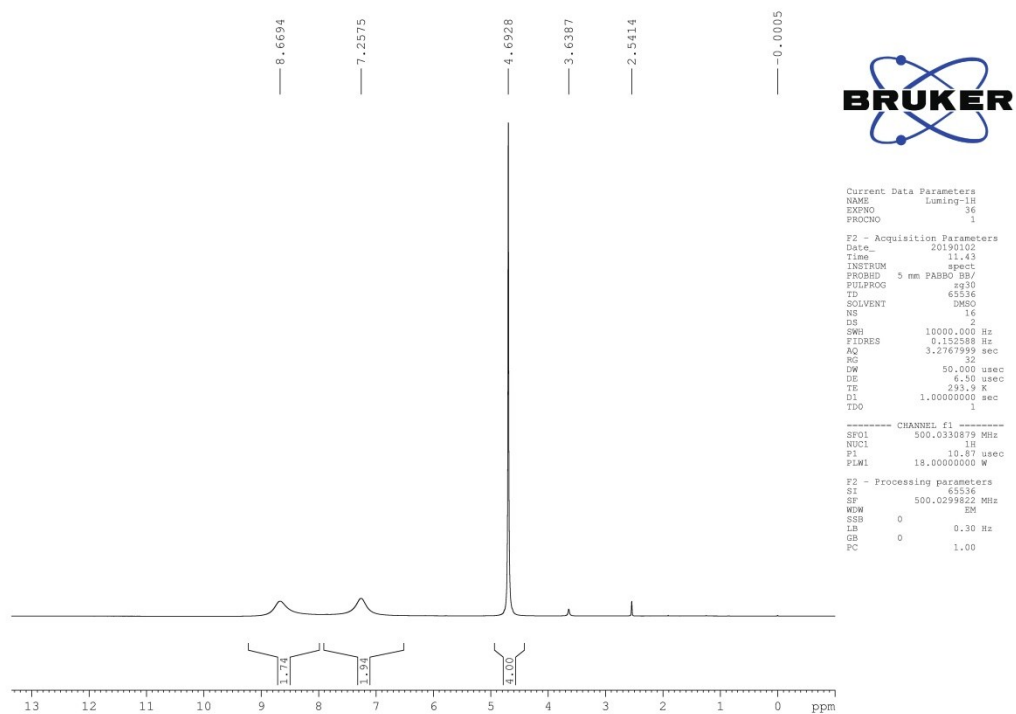

Fig. S18  $^1\text{H}$  NMR spectrum of **7** in  $d_6$ -DMSO.

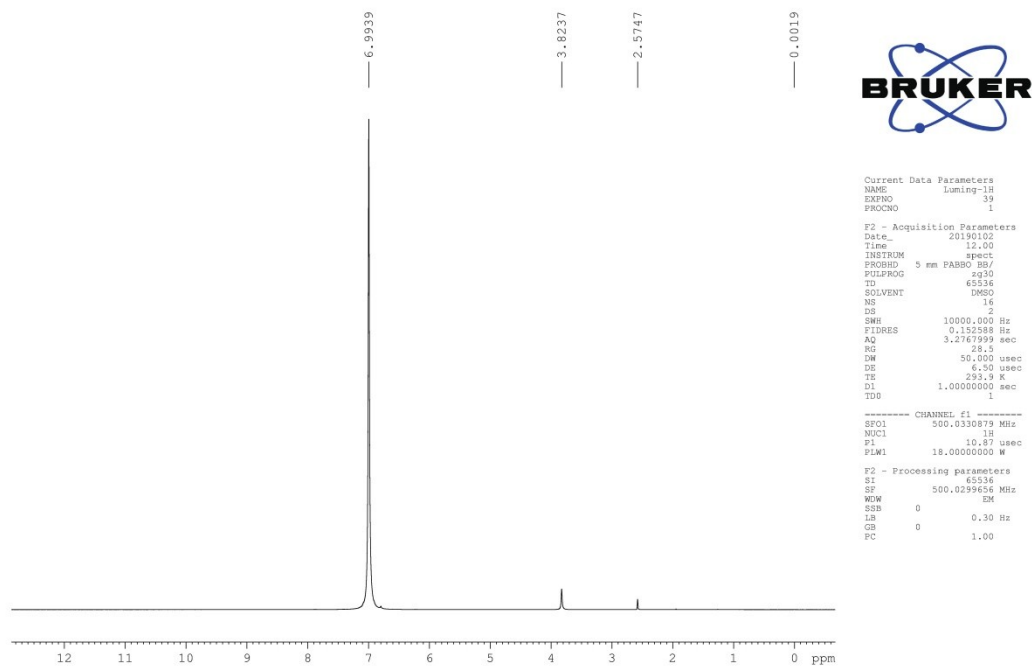

Fig. S19  $^1\text{H}$  NMR spectrum of **8** in  $d_6$ -DMSO.

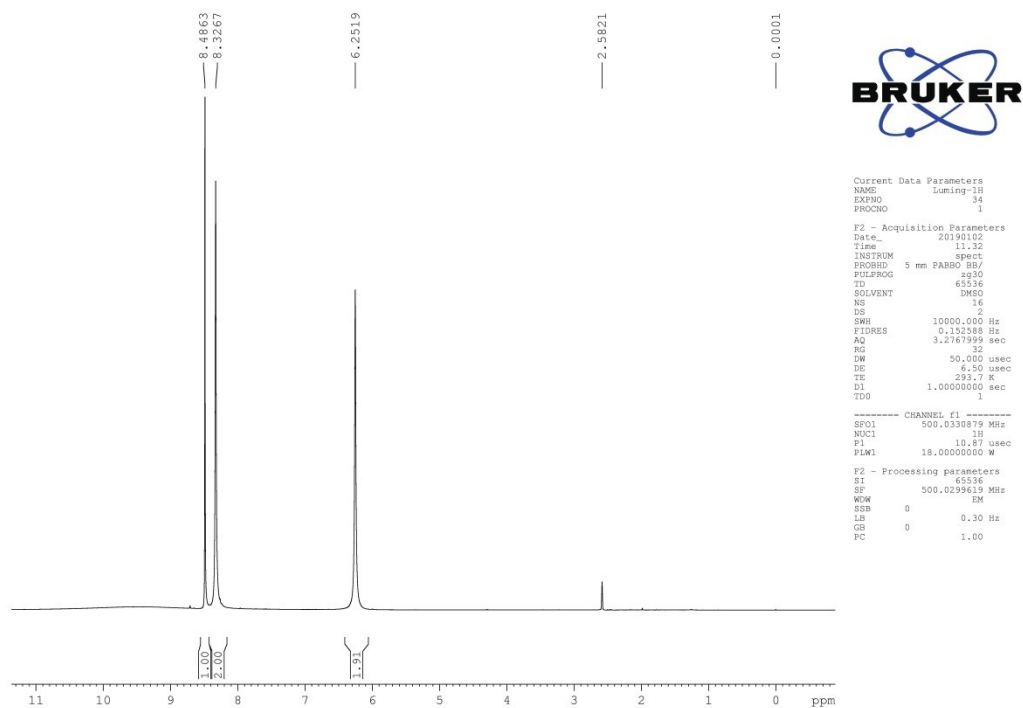

Fig. S20  $^1\text{H}$  NMR spectrum of **9** in  $d_6$ -DMSO.

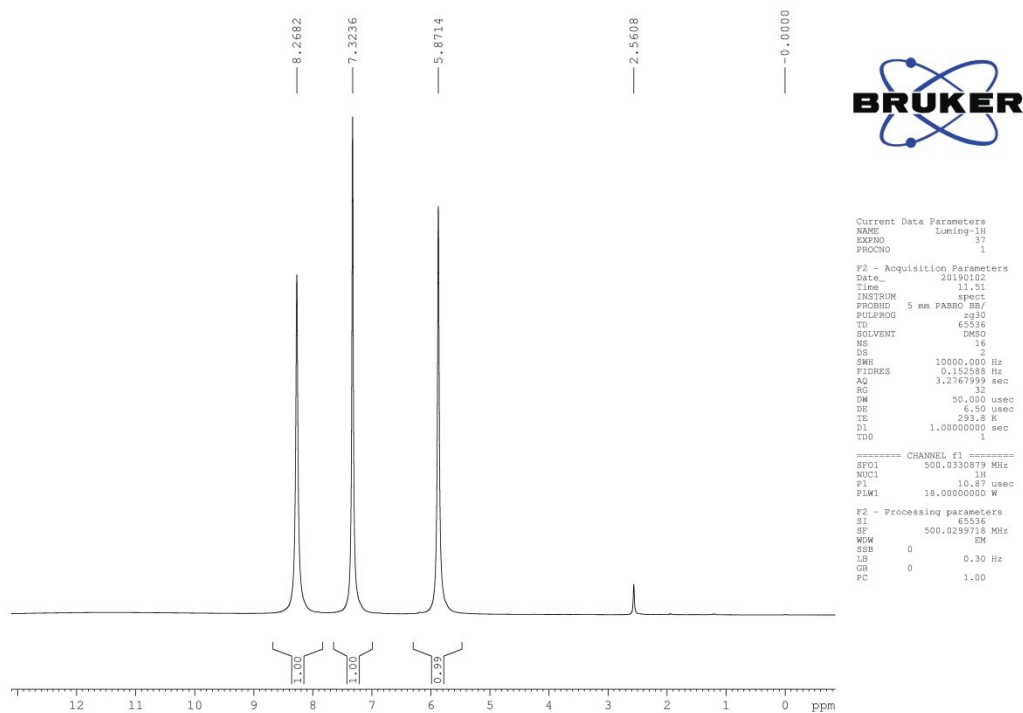

Fig. S21  $^1\text{H}$  NMR spectrum of **10** in  $d_6$ -DMSO.

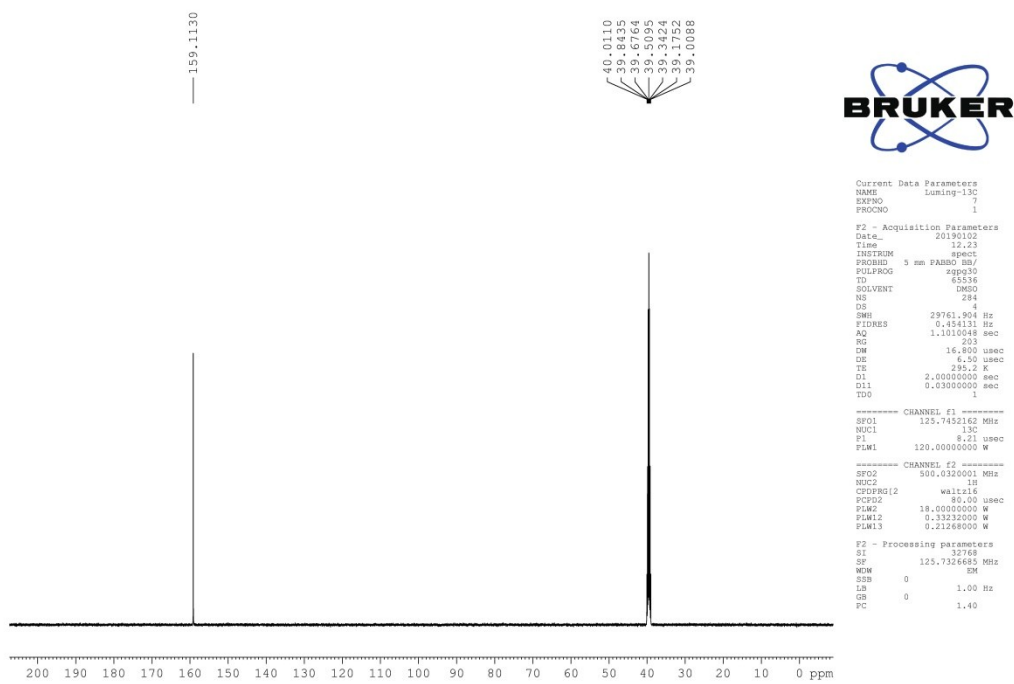

Fig. S22  $^{13}\text{C}$  NMR spectrum of **6** in  $d_6$ -DMSO.

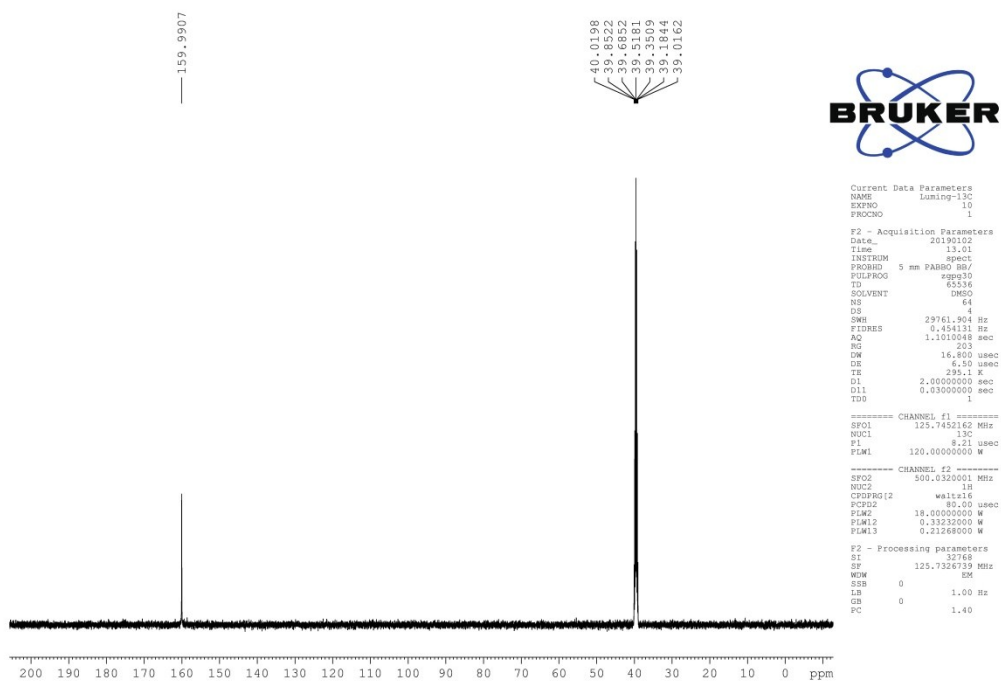

Fig. S23  $^{13}\text{C}$  NMR spectrum of **7** in  $d_6$ -DMSO.

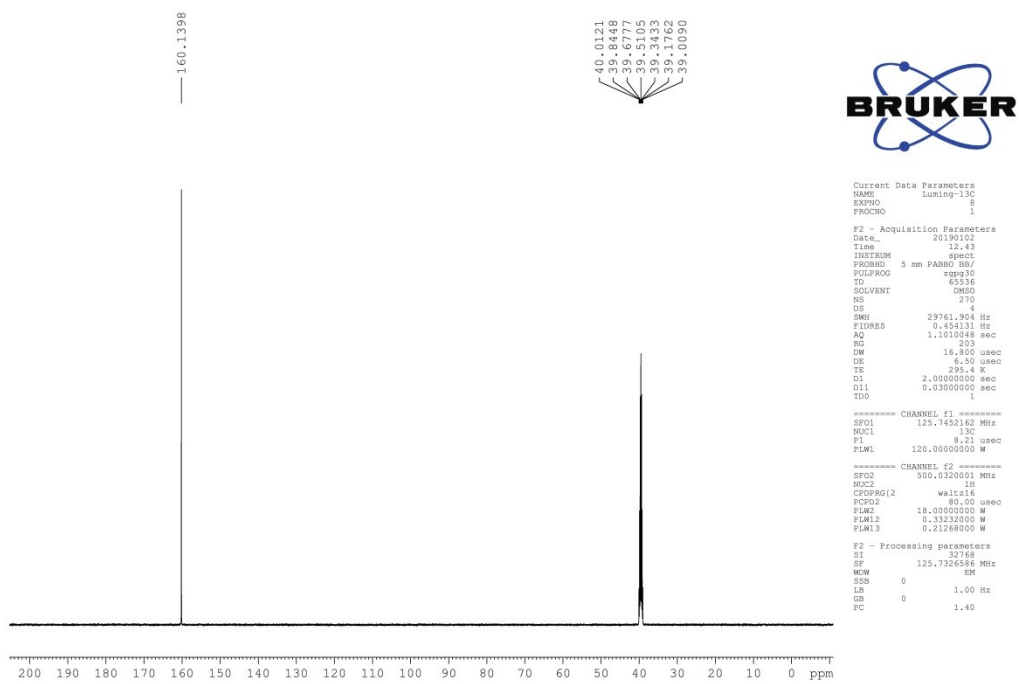

Fig. S24  $^{13}\text{C}$  NMR spectrum of **8** in  $d_6$ -DMSO.

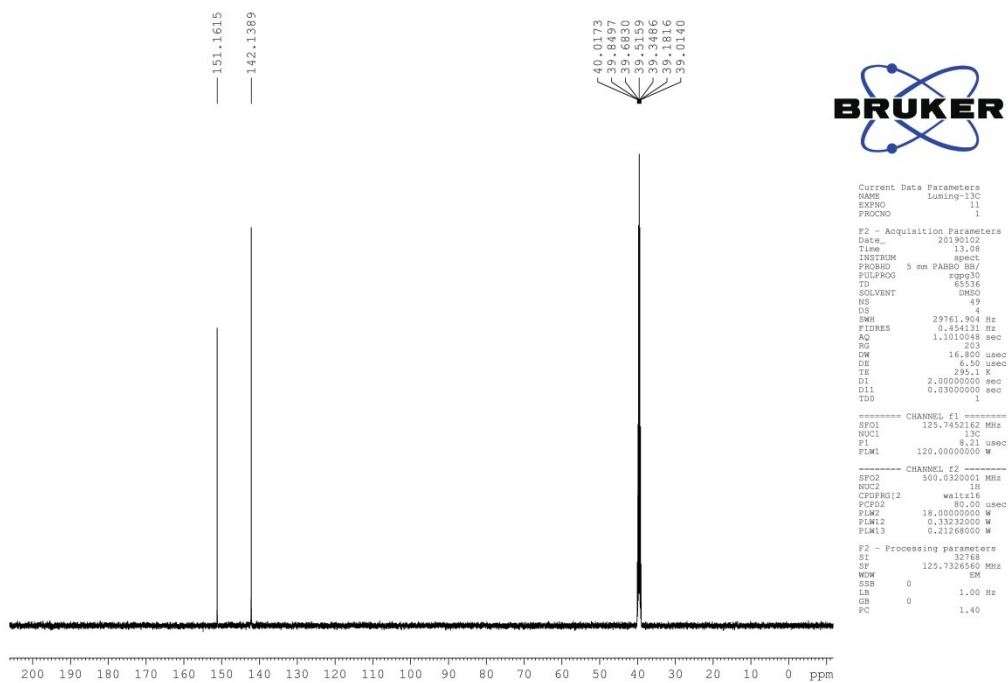

Fig. S25  $^{13}\text{C}$  NMR spectrum of **9** in  $d_6$ -DMSO.

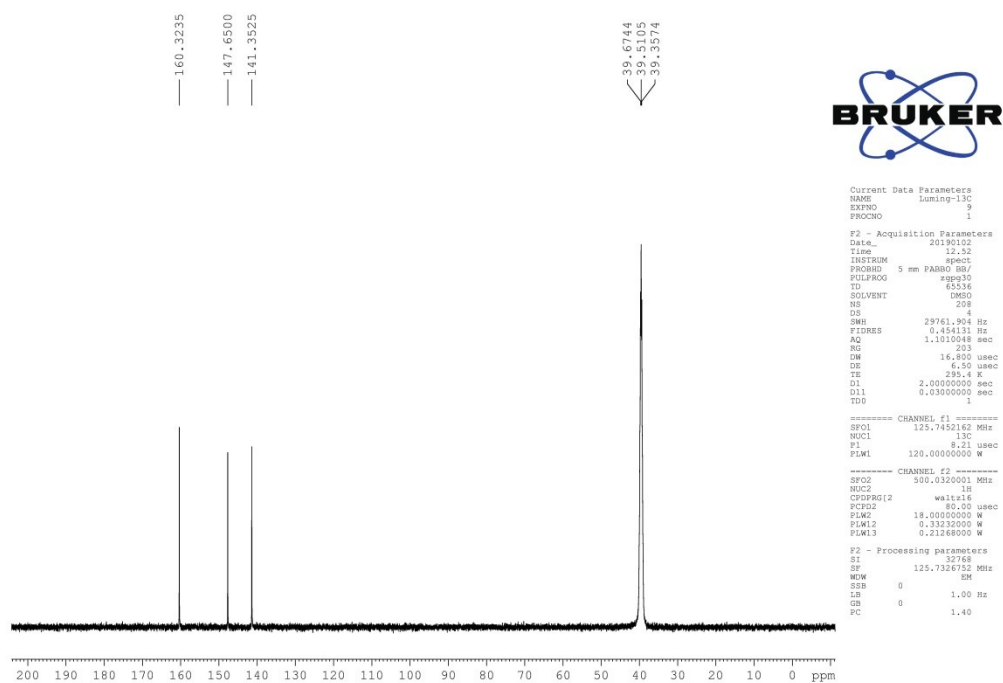

**Fig. S26**  $^{13}\text{C}$  NMR spectrum of **10** in  $d_6$ -DMSO.

## 12. Powder X-ray diffraction (PXRD) pattern of $\text{AgN}_5$ (**1**)

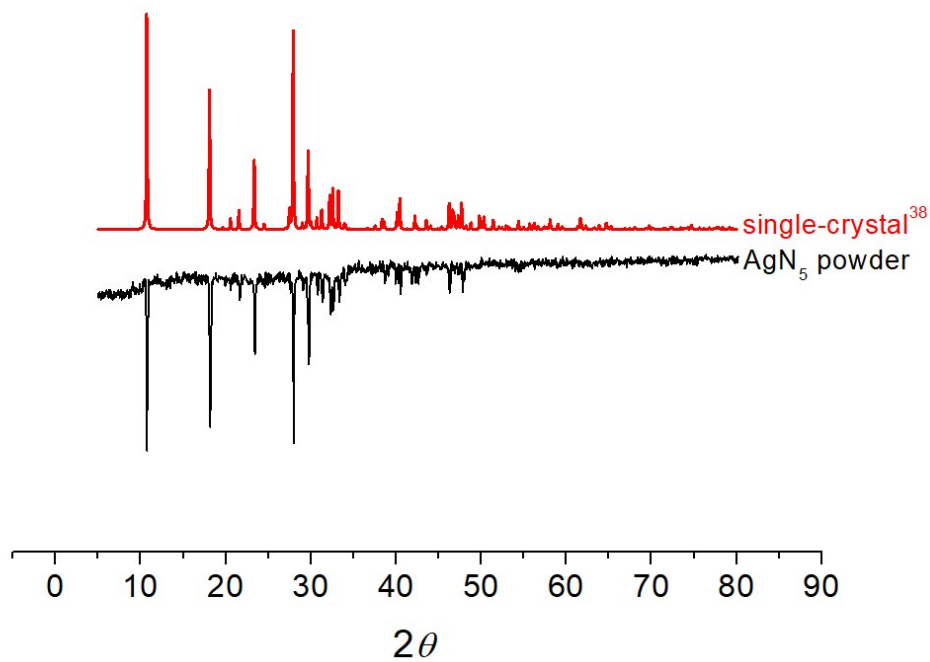

**Fig. S27** The PXRD pattern of  $\text{AgN}_5$  and the calculated pattern from its single-crystal structure.

### 13. Topology for **2**

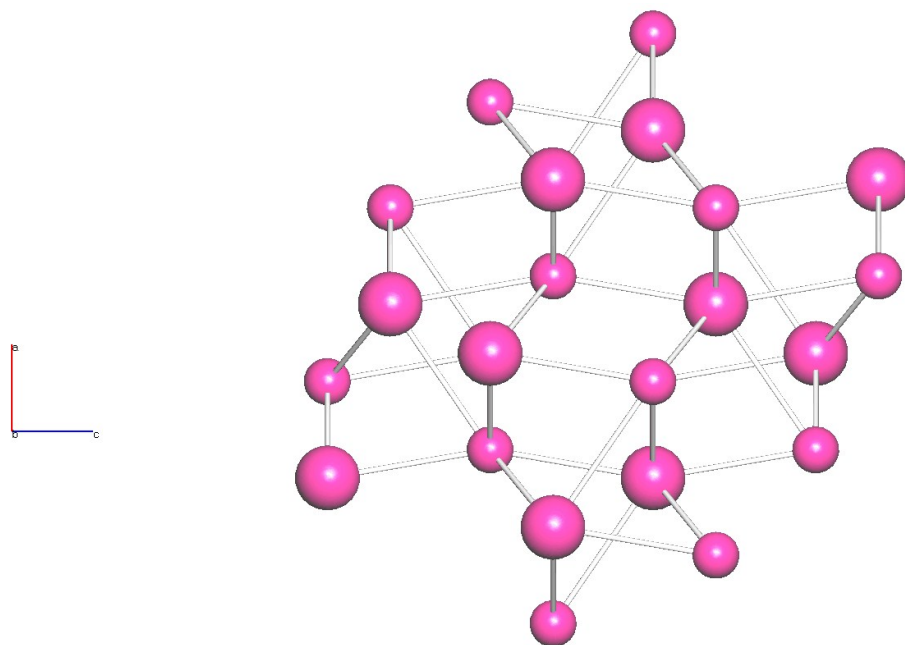

**Fig. S28** Topology for **2** (topological type:  $\{4^{15}.6^6\}\{4^{17}.6^4\}$ ). The *cyclo-N<sub>5</sub><sup>-</sup>* ligands are represented by small spheres and the K ions are represented by larger spheres.

### 14. TG and DSC curves of **4**·2H<sub>2</sub>O

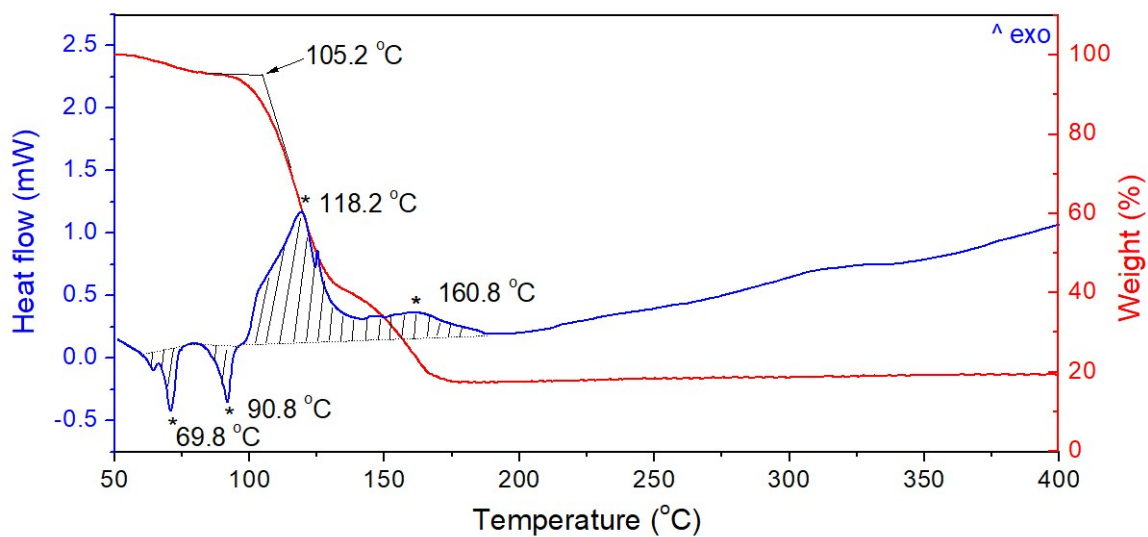

**Fig. S29** TG and DSC curves of **4**·2H<sub>2</sub>O under nitrogen with a heating rate of 5 °C min<sup>-1</sup>.



## 15. Calculation of heats of formation

For energetic salts, the solid-phase heats of formation are calculated on the basis of a Born-Haber energy cycle (Scheme S1).

Based on a Born-Haber energy cycle, the heat of formation of a salt can be simplified by the formula given in Equation (1):

$$\Delta H_f^\circ (\text{salt}, 298 \text{ K}) = \Delta H_f^\circ (\text{cation}, 298\text{K}) + \Delta H_f^\circ (\text{anion}, 298\text{K}) - \Delta H_L \quad (1)$$

where  $\Delta H_L$  is the lattice energy of the salts, which could be predicted by using the formula suggested by Jenkins et al.<sup>2</sup> [Eq. (2)]

$$\Delta H_L = U_{\text{POT}} + [p(n_M/2 - 2) + q(n_X/2 - 2)]RT \quad (2)$$

where  $n_M$  and  $n_X$  depend on the nature of the ions,  $M_p^+$  and  $X_q^-$ , and are equal to 3 for monatomic ions, 5 for linear polyatomic ions, and 6 for nonlinear polyatomic ions.

The equation for lattice potential energy  $U_{\text{POT}}$  [Eq. (3)] has the form:

$$U_{\text{POT}} [\text{kJ mol}^{-1}] = \gamma(\rho_m/M_m)^{1/3} + \delta \quad (3)$$

Where  $\rho_m/\text{g cm}^{-3}$  is the density,  $M_m$  is the chemical formula mass of the ionic material, and values for the coefficients  $\gamma/\text{kJ mol}^{-1} \text{ cm}$  and  $\delta/\text{kJ mol}^{-1}$  are taken from the literature<sup>3</sup>.

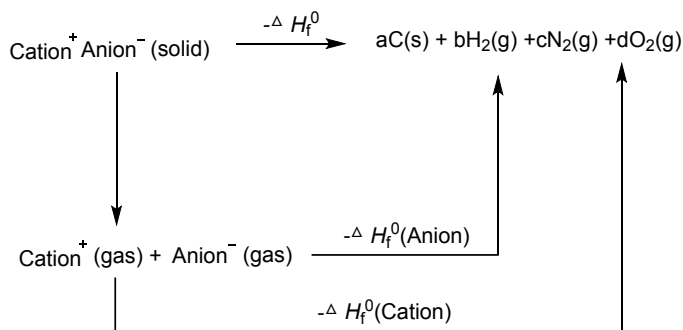

Scheme S1. Born-Haber cycle for the formation of energetic salts

## References

- 1 E. R. Johnson and S. Keinan, *J. Am. Chem. Soc.*, 2010, **132**, 6498-6506.
- 2 H. D. B. Jenkins, D. Tudela and L. Glasser, *Inorg. Chem.*, 2002, **41**, 2364-2367.
- 3 H. D. B. Jenkins, H. K. Roobottom, J. Passmore and L. Glasser, *Inorg. Chem.*, 1999, **38**, 3609-3620.
